# Supplementary material for: Admission glucose level and short-term mortality in older patients with acute myocardial infarction: results from the KORA Myocardial Infarction Registry
Source: PubMed Central journal article supplement — BMJ Open. 2021 Jun 3;11(6):e046641. doi: 10.1136/bmjopen-2020-046641 (PMC8183232; doi:10.1136/bmjopen-2020-046641), 2021-06-03
Supplement: bmjopen-2020-046641.draft_revisions.pdf [file bmjopen-2020-046641.draft_revisions.pdf]

# BMJ Open

BMJ Open is committed to open peer review. As part of this commitment we make the peer review history of every article we publish publicly available.

When an article is published we post the peer reviewers' comments and the authors' responses online. We also post the versions of the paper that were used during peer review. These are the versions that the peer review comments apply to.

The versions of the paper that follow are the versions that were submitted during the peer review process. They are not the versions of record or the final published versions. They should not be cited or distributed as the published version of this manuscript.

BMJ Open is an open access journal and the full, final, typeset and author-corrected version of record of the manuscript is available on our site with no access controls, subscription charges or pay-per-view fees (<http://bmjopen.bmj.com>).

If you have any questions on BMJ Open's open peer review process please email [info.bmjopen@bmj.com](mailto:info.bmjopen@bmj.com)

# BMJ Open

## Admission glucose level and short-term mortality in older patients with acute myocardial infarction: results from the KORA myocardial infarction registry

|                               |                                                                                                                                                                                                                                                                                                                                                                                                                                                                                                                                                                                                                                                                                                                                                                                                                                                                                                                                                                                                                                                                                                                                                                                                                                                                                                                                                                                                                                       |
|-------------------------------|---------------------------------------------------------------------------------------------------------------------------------------------------------------------------------------------------------------------------------------------------------------------------------------------------------------------------------------------------------------------------------------------------------------------------------------------------------------------------------------------------------------------------------------------------------------------------------------------------------------------------------------------------------------------------------------------------------------------------------------------------------------------------------------------------------------------------------------------------------------------------------------------------------------------------------------------------------------------------------------------------------------------------------------------------------------------------------------------------------------------------------------------------------------------------------------------------------------------------------------------------------------------------------------------------------------------------------------------------------------------------------------------------------------------------------------|
| Journal:                      | <i>BMJ Open</i>                                                                                                                                                                                                                                                                                                                                                                                                                                                                                                                                                                                                                                                                                                                                                                                                                                                                                                                                                                                                                                                                                                                                                                                                                                                                                                                                                                                                                       |
| Manuscript ID                 | bmjopen-2020-046641                                                                                                                                                                                                                                                                                                                                                                                                                                                                                                                                                                                                                                                                                                                                                                                                                                                                                                                                                                                                                                                                                                                                                                                                                                                                                                                                                                                                                   |
| Article Type:                 | Original research                                                                                                                                                                                                                                                                                                                                                                                                                                                                                                                                                                                                                                                                                                                                                                                                                                                                                                                                                                                                                                                                                                                                                                                                                                                                                                                                                                                                                     |
| Date Submitted by the Author: | 11-Nov-2020                                                                                                                                                                                                                                                                                                                                                                                                                                                                                                                                                                                                                                                                                                                                                                                                                                                                                                                                                                                                                                                                                                                                                                                                                                                                                                                                                                                                                           |
| Complete List of Authors:     | <p>Mamadjanov, Temur; Ludwig-Maximilians-Universitat Munchen, Institute for Medical Information Processing, Biometry and Epidemiology – IBE; Ludwig-Maximilians-Universitat Munchen, UNIKA-T Augsburg</p> <p>Volaklis, Konstantinos; Ludwig-Maximilians-Universitat Munchen, Chair of Epidemiology, UNIKA-T Augsburg</p> <p>Heier , Margit; Helmholtz Zentrum Munchen Deutsches Forschungszentrum fur Gesundheit und Umwelt, Epidemiology; Universitätsklinikum Augsburg, KORA Study Centre</p> <p>Freuer, Dennis; Ludwig-Maximilians-Universitat Munchen, Chair of Epidemiology, UNIKA-T Augsburg</p> <p>Amann, Ute ; Helmholtz Zentrum Munchen Deutsches Forschungszentrum fur Gesundheit und Umwelt, Independent Research Group Clinical Epidemiology</p> <p>Peters, Annette; Helmholtz Zentrum Munchen Deutsches Forschungszentrum fur Gesundheit und Umwelt, Epidemiology</p> <p>Kuch, B; Hospital of Nördlingen, Department of Internal Medicine/Cardiology</p> <p>Thilo, Christian; University Hospital Augsburg, Department of Cardiology, Respiratory Medicine and Intensive Care</p> <p>Linseisen, Jakob; Ludwig-Maximilians-Universitat Munchen, Chair of Epidemiology at UNIKA-T; Helmholtz Zentrum Munchen Deutsches Forschungszentrum fur Umwelt und Gesundheit, Independent Research Group Clinical Epidemiology</p> <p>Meisinger, Christa; Ludwig-Maximilians-Universitat Munchen, Chair of Epidemiology, UNIKA-T</p> |
| Keywords:                     | Cardiac Epidemiology < CARDIOLOGY, Myocardial infarction < CARDIOLOGY, EPIDEMIOLOGY                                                                                                                                                                                                                                                                                                                                                                                                                                                                                                                                                                                                                                                                                                                                                                                                                                                                                                                                                                                                                                                                                                                                                                                                                                                                                                                                                   |
|                               |                                                                                                                                                                                                                                                                                                                                                                                                                                                                                                                                                                                                                                                                                                                                                                                                                                                                                                                                                                                                                                                                                                                                                                                                                                                                                                                                                                                                                                       |

SCHOLARONE™  
Manuscripts

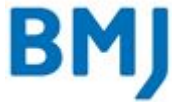

I, the Submitting Author has the right to grant and does grant on behalf of all authors of the Work (as defined in the below author licence), an exclusive licence and/or a non-exclusive licence for contributions from authors who are: i) UK Crown employees; ii) where BMJ has agreed a CC-BY licence shall apply, and/or iii) in accordance with the terms applicable for US Federal Government officers or employees acting as part of their official duties; on a worldwide, perpetual, irrevocable, royalty-free basis to BMJ Publishing Group Ltd ("BMJ") its licensees and where the relevant Journal is co-owned by BMJ to the co-owners of the Journal, to publish the Work in this journal and any other BMJ products and to exploit all rights, as set out in our [licence](#).

The Submitting Author accepts and understands that any supply made under these terms is made by BMJ to the Submitting Author unless you are acting as an employee on behalf of your employer or a postgraduate student of an affiliated institution which is paying any applicable article publishing charge ("APC") for Open Access articles. Where the Submitting Author wishes to make the Work available on an Open Access basis (and intends to pay the relevant APC), the terms of reuse of such Open Access shall be governed by a Creative Commons licence – details of these licences and which [Creative Commons](#) licence will apply to this Work are set out in our licence referred to above.

Other than as permitted in any relevant BMJ Author's Self Archiving Policies, I confirm this Work has not been accepted for publication elsewhere, is not being considered for publication elsewhere and does not duplicate material already published. I confirm all authors consent to publication of this Work and authorise the granting of this licence.

1  
2  
3 **Admission glucose level and short-term mortality in older patients with acute myocardial**  
4 **infarction: results from the KORA myocardial infarction registry**  
5

6 Mamadjanov T<sup>1,2,3\*</sup>, Volaklis K<sup>3\*</sup>, Heier M<sup>4,8</sup>, Freuer D<sup>3</sup>, Amann U<sup>5</sup>, Peters A<sup>4</sup>, Kuch B<sup>6</sup>, Thilo  
7 C<sup>7</sup>, Linseisen J<sup>3,5</sup>, Meisinger C<sup>3,5</sup>  
8  
9

10  
11  
12 <sup>1</sup> Institute for Medical Information Processing, Biometry and Epidemiology – IBE, LMU  
13 Munich, Germany  
14

15 <sup>2</sup> Pettenkofer School of Public Health Munich, Germany  
16

17 <sup>3</sup> Ludwig-Maximilians-Universität München, Chair of Epidemiology, UNIKA-T Augsburg,  
18 Neusässer Str. 47, 86156 Augsburg, Germany  
19

20 <sup>4</sup> KORA study centre, University Hospital of Augsburg, Augsburg, Germany  
21

22 <sup>5</sup> Helmholtz Zentrum München, Independent Research Group Clinical Epidemiology,  
23 Ingolstädter Landstr. 1, 85764 Neuherberg, Germany  
24

25 <sup>6</sup> Hospital of Nördlingen, Department of Internal Medicine/Cardiology, Nördlingen, Germany  
26

27 <sup>7</sup> University Hospital of Augsburg, Department of Cardiology, Respiratory Medicine and  
28 Intensive Care, Stenglinstr. 2, 86156 Augsburg, Germany  
29

30 <sup>8</sup> Universitätsklinikum Augsburg, KORA Study Centre, Augsburg, Germany  
31  
32

---

33 \* shared first authorship  
34

35 Correspondence to Temur Mamadjanov (temurmamadjanov@gmail.com)  
36  
37  
38  
39  
40  
41  
42  
43  
44  
45  
46  
47  
48  
49  
50  
51  
52  
53  
54  
55  
56  
57  
58  
59  
60

## Abstract

### **Study objectives:**

To investigate the association between admission blood glucose levels and 28-day mortality as well as in-hospital complications in older patients with incident acute myocardial infarction (AMI) undergoing modern treatment.

### **Methods:**

From a German population-based regional myocardial infarction registry, 5530 patients (2016 females), aged 65-84 years, hospitalized with an incident AMI between January 1, 2009 and December 31, 2016 were included in the study. Multivariable logistic regression models were used to assess the associations between admission blood glucose and 28-day-mortality as well as in-hospital complications after AMI. Analyses stratified according to age, diabetes, and type of infarction (ST-elevation MI/non-ST-elevation MI) were conducted.

### **Results:**

The adjusted odds ratios for admission blood glucose predicting 28-day-mortality in young-old (65-74) and old (75-85) AMI patients were 1.41 (95% CI: 1.21-1.64) and OR 1.21 (95% CI: 1.00-1.50) per 1 SD increase in admission blood glucose, respectively. Admission blood glucose was also significantly associated with major cardiac complications in both age groups, with a higher risk in older patients. The associations were irrespective of diabetes status but not of infarction type.

### **Conclusion:**

It seems that admission blood glucose plays a different role as a predictor of adverse short-term outcomes in certain subgroups of older AMI patients underscoring the importance of a targeted glycemetic control during hospital stay.

**Keywords:** myocardial infarction, admission blood glucose, mortality, elderly

### ***Strengths and limitations***

This study was observational and was limited to 65-84 years old German patients with incident AMI.

The analysis was limited to admission blood glucose values only and it cannot be ruled out that some hyperglycemic patients without a history of diabetes are true diabetes cases who have not been diagnosed before.

Multivariable analysis was adjusted for several risk factors, residual confounding cannot be entirely excluded.

Data was collected within the framework of the population-based MI registry.

Important risk factors such as comorbidities, in-hospital treatment and complications were included in the analysis.

## Introduction

Elevated admission blood glucose levels are common in patients hospitalized for acute myocardial infarction (AMI); the prevalence of admission hyperglycemia in epidemiological studies for these patients ranges from 40% to > 58% (1, 2). Several studies and meta-analyses further suggested that hyperglycemia upon admission is an independent risk factor for adverse outcomes and mortality among patients hospitalized with AMI (3, 4).

Trimmer et al. (5) demonstrated that higher glucose level on admission is independently associated with increased sensitivity to ischemia-reperfusion injury such as impaired initial flow in the infarct-related artery. Blood glucose level was also described as an independent prognostic factor for impaired microvascular function, or the no-reflow phenomenon (6). In addition, some studies showed that patients with hyperglycemia have a higher Killip class and thus mortality risk (7). Moreover, a larger infarct size and worse left ventricular function were linked to a higher glucose level (8), and an addition of blood glucose levels improves the predictive ability of the Global Registry of Acute Coronary Events (GRACE) risk score (9, 10).

The majority of the existing studies were conducted in the pre-reperfusion era (3, 11-13), were focused on diabetic or non-diabetic subjects (14, 15) or included the whole spectrum of acute coronary syndromes in their analysis (16). So far, only a few studies examined the association between admission blood glucose levels and short-term outcomes (including in-hospital mortality and cardiac complications) in older people (17). Furthermore, the association between admission glucose in certain subgroups of older AMI patients are missing so far. Therefore, the aim of this study including all non-selected hospitalized cases with incident AMI was to investigate the association of admission glucose on 28-day case fatality and cardiac complications in 65 to 84 years old patients undergoing non-invasive and invasive therapy. Analyses stratified according to diabetes, age, and type of infarction were conducted to determine the importance of admission blood glucose for the short-term prognosis of certain AMI patient subgroups.

## Methods

### *Study design and data source*

Data for the present observational study came from the population-based KORA (Cooperative Health Research in the Region of Augsburg) Myocardial Infarction Registry (Bavaria, Germany), which was implemented in October 1984 as part of the WHO MONICA (Monitoring Trends and Determinants in Cardiovascular Disease) project. Since then all cases of fatal and non-fatal acute myocardial infarction (AMI) occurring among the 25 to 74 years old residents of the study area (city of Augsburg and two adjacent counties), who were admitted to one out of 8 hospitals in the study area have been continuously registered. The registry was included into the KORA framework when the MONICA project was terminated in 1995. Detailed information on methods of case identification, diagnostic classification of events, and quality control of the data have been described in previous publications (18-20). Diagnostic criteria for AMI case identification were adapted to the joint statement of the European Society of Cardiology and American College of Cardiology and applied since 2001 (21). From 2009 onwards, the registry was extended for the elderly up to 84 years.

### *Data collection and measurements*

Patients with AMI, who have survived for at least 24 hours after hospitalization were interviewed by specially trained nurses using a standardized questionnaire. Information on sociodemographic data, acute symptoms, cardiovascular risk factors, history of several diseases, and diabetes status were collected. Data on AMI characteristics, drug treatment before and during hospital stay, medication use at discharge, in-hospital adverse events, including ventricular fibrillation, cardiogenic shock, cardiac arrest, recurrent myocardial infarction, and pulmonary edema were provided by chart review. Additionally, laboratory parameters including the first blood glucose level at admission (referred as admission glucose level), the peak glucose level during hospital stay, ECG data, and the process of care in hospital were also determined. The kind of reperfusion therapy (thrombolysis, percutaneous coronary intervention, and coronary artery bypass grafting) was documented. The study has been approved by the ethics committee of the Bavarian Medical Association (Bayerische Landesärztekammer) and the study was performed in accordance with the Declaration of Helsinki. All study participants gave written informed consent.



### *Study population*

Between January 1, 2009 and December 31, 2016, a total of 7681 patients aged 65 to 84 years were admitted to one of the hospitals in the study region due to an AMI. Of those, 1803 patients had a re-infarction and 9 patients had missing information on infarction history and were therefore excluded. Furthermore, we excluded 255 patients without data on admission glucose level and 84 patients with missing covariates information. This resulted in a total of 5530 patients (3514 men, 2016 women) with incident AMI for analysis.

### *Patient and public involvement*

Patients and public were not involved in the research process.

### *Outcomes*

The primary endpoint of the study was case fatality within 28 days. A multiple logistic regression model was used to assess the association between the first admission glucose level and 28-day case fatality. The secondary endpoint was a combined endpoint of in-hospital complications including cardiac arrest, recurrent infarction, pulmonary edema, cardiogenic shock, ventricular tachycardia, ventricular bradycardia and ventricular fibrillation.

### *Statistical analysis*

Continuous data were expressed as mean values and standard deviation (SD) as well as median and interquartile range (25th and 75th quintile) in case of non-normal distribution. Categorical data were described with absolute values and percentages. Chi-square test was used to test differences in prevalences. The two-sided Welch's t-test was used to compare means.

Multivariable analyses were performed for the whole sample and also stratified by age-groups (65-74/75-85 years), diabetes status (yes/no), type of infarction (STEMI/NSTEMI), and kidney function using forward stepwise logistic regression to identify variables independently associated with 28-day case fatality after AMI. The variables age (only in the analysis including the total sample) and sex were forced into each model during the variable selection procedure. The significance criterion for staying in the final model was chosen as  $p < 0.05$ . The association between admission blood glucose level and the primary endpoint was adjusted for

1  
2  
3 sex and age in the first model. The second model included previous factors and any  
4 reperfusion therapy (yes/no), treatment with angiotensin-converting enzyme (ACE) inhibitor  
5 (yes/no), beta-blocker (yes/no), lipid-lowering drug (yes/no), antiplatelets during hospital stay  
6 (yes/no), insulin (yes/no), cardiac arrest during hospitalization (yes/no), any other  
7 complication during hospital stay (recurrent infarction, ventricular fibrillation, ventricular  
8 tachycardia, bradycardia, pulmonary edema and cardiogenic shock), and diabetes (yes/no).  
9

10  
11 In logistic regression analysis investigating the association between admission blood glucose  
12 level and the secondary endpoint, the first model included admission blood glucose, age and  
13 sex. The second model was adjusted additionally for diabetes (yes/no), any reperfusion  
14 therapy (yes/no), treatment with angiotensin-converting enzyme (ACE) inhibitor (yes/no),  
15 beta-blocker (yes/no), lipid-lowering drug (yes/no), antiplatelets during hospital stay (yes/no),  
16 and insulin (yes/no). Odds ratios and 95% CI interval were computed per 1 SD increase of  
17 admission blood glucose level.  
18  
19

20  
21 We conducted a formal test to identify an interaction with sex, age, diabetes and myocardial  
22 infarction type. The test showed significant interaction with age and diabetes. Due to a  
23 significant interaction with age, the sample was stratified into two age groups: “young old”  
24 patients (65-74 years) and “old” patients (75-85 years) (Figure 1). In addition, stratified  
25 analyses were conducted for patients with and without diabetes, and for STEMI/NSTEMI  
26 patients.  
27  
28

29  
30 We used restricted cubic splines with different numbers of knots for testing the linearity  
31 assumption of the appropriate multivariable logistic model. For all investigations, a  
32 significance level of 5% was applied. Analyses were performed using R version 3.5.2.  
33  
34  
35  
36  
37  
38  
39  
40  
41  
42  
43  
44  
45  
46  
47  
48  
49  
50  
51  
52  
53  
54  
55  
56  
57  
58  
59  
60

## Results

In total, the study sample consisted of 5530 women and men aged 65-84 years. There were 292 (7.9%) deaths within 28 days among 3709 patients aged 65-74 years and 209 (11.5%) deaths among 1821 patients aged 75-84 years. The median admission glucose level was 94.0 mg/dl (interquartile range 68.0 to 138.0 mg/dl) and 37.9% of the patients in the total sample had diabetes.

The baseline characteristics of the patients according to the age groups are shown in Table 1. The older age group was associated with a higher proportion of female patients and a higher frequency of patients with a history of hypertension. In the younger age group a higher prevalence of ST-elevation myocardial infarction type as well as non-ST-elevation myocardial infarction type than in the older age group was observed. Patients in the younger age group showed a higher prevalence of lipid disorders in comparison to the older age group.

Treatment during hospital stay according to the age groups is shown in Table 2. More young old patients less likely received ACE inhibitors, beta-blockers and nitrates. On the other hand, older patients were more often treated with calcium channel blockers and angiotensin II antagonists. There was no difference in treatment with lipid lowering drugs, anticoagulants and insulin. At least one recanalization therapy (PCI, CABG or thrombolysis) was more likely performed in the younger old compared to the older patients.

Major complications in AMI patients occurring during hospital stay are listed in Table 3. Frequency of in-hospital cardiac arrest was significantly higher in the older patients' group. Regarding other in-hospital complications including cardiogenic shock, pulmonary edema, ventricular fibrillation, tachycardia and re-infarction there was no significant difference between the two age groups.

In the whole sample, as it is presented in Table 4, admission blood glucose was significantly associated with 28-day case fatality: per 1 SD increase in admission blood glucose level the OR for 28-day mortality was 1.33 (95% CI: 1.21-1.63). In the younger old group there was also a significant relationship; per 1 SD increase of blood glucose the OR for 28-day case fatality was 1.41 (95% CI: 1.21-1.64). Among the older patients, there was no significant association in the fully adjusted model (OR 1.21; 95% CI: 1.00-1.50).

1  
2  
3 In addition, blood glucose levels at admission were independently associated with major in-  
4 hospital complications in the total sample and in both age groups (Table 4). Among all patients  
5 the OR for any major complication was 1.26 (95% CI: 1.17-1.35) per 1 SD increase of blood  
6 glucose level; among the patients aged 65-74 years and 75-84 years the OR was 1.23 (95% CI:  
7 1.13-1.34) and 1.31 (95% CI: 1.16-1.48) per 1 SD increase of blood glucose level, respectively.  
8  
9

10  
11  
12  
13 The increased admission glucose level was significantly associated with higher 28-day  
14 mortality and hospital complications, irrespective of diabetes status in both the younger old  
15 and old group. However, the observed associations were stronger in AMI patients without  
16 diabetes (Table 4). In patients with STEMI but not with NSTEMI a significant association with  
17 28-day case-fatality could be observed for both, young old and old patients. Regarding in-  
18 hospital complications, in STEMI patients a significant relationship could be found for the older  
19 patients (OR 1.67; 95% CI: 1.24-2.26). In NSTEMI patients a significant association with in-  
20 hospital complications could be shown for both the younger old (OR 1.16; 95% CI 1.03-1.30)  
21 and old group (OR 1.24; 95% CI 1.04-1.47).  
22  
23  
24  
25  
26  
27  
28  
29  
30  
31  
32  
33  
34  
35  
36  
37  
38  
39  
40  
41  
42  
43  
44  
45  
46  
47  
48  
49  
50  
51  
52  
53  
54  
55  
56  
57  
58  
59  
60

## Discussion

In this real-world study including all consecutive hospitalized, unselected cases with incident AMI in patients 65 to 84 years of age, 28-day case fatality was associated with increasing blood glucose concentrations measured at hospital admission. The risk of death in the younger old patients (65-74 years) increased significantly with increasing blood glucose levels, but in the older patients' group (75-84 years) no independent association was found. In addition, admission glucose was significantly associated with a higher 28-day mortality in the total sample of patients with and without diabetes, and in STEMI patients. The risk of major in-hospital complications after incident AMI was also related to higher admission blood glucose levels in both age groups, in patients with and without diabetes, STEMI and NSTEMI patients.

Previous studies have demonstrated that elevated blood glucose on admission is common in patients with AMI and is independently associated with a higher risk of in-hospital mortality and in-hospital complications, such as cardiac arrest, cardiogenic shock, and pulmonary edema regardless of diabetes status (22-24). Although numerous studies have documented this association (17, 25-27), the impact of admission blood glucose on short-term mortality and in-hospital complications in older patients with AMI remains underappreciated so far.

In a large population-based study including AMI patients aged 65 years and older (17), glucose levels were associated with 30-day case fatality in patients without known diabetes (referent: glucose  $\leq$  110 mg/dl; range from glucose  $>$ 110 to 140 mg/dl: HR 1.17; 95% CI: 1.11-1.24; to glucose  $>$ 240 mg/dl: HR 1.87; 95% CI: 1.75-2.00). In a nationally representative study of patients (median age 67 years) hospitalized with AMI in China, Zhao et al. (27) reported that both moderate and severe hyperglycemia (blood glucose  $\geq$  11.1 mmol/L) on admission were associated with an elevated risk for in-hospital mortality among both nondiabetic and diabetic patients. Fujino et al. (26) analyzed the short-term outcome of acute hyperglycemia on admission ( $\geq$  200 mg/dL) and chronic hyperglycemia defined by an HbA1C  $\geq$  6.5% in a small sample of acute AMI patients and reported that acute hyperglycemia but not chronic hyperglycemia was an independent predictor of in-hospital mortality.

Several prior studies examined the association between hyperglycemia on admission and complications of AMI. Dziewierz et al. (22) analyzed data of elderly AMI patients of the Poland's Krakow Registry and found that hyperglycemia on admission was related to an

1  
2  
3 increased risk of pulmonary edema and heart rhythm/conduction disturbances in both  
4 diabetic and nondiabetic patients. In another study Kim et al. (24) found a significant  
5 association between hyperglycemia and life-threatening complications during hospitalization  
6 such as cardiogenic shock, decreased hemoglobin level (hemoglobin  $\geq$  5g/dL), atrioventricular  
7 block, ventricular tachycardia, and atrial fibrillation. Besides, they observed that a higher age  
8 of patients ( $\geq$  75 years), female sex, STEMI, low LV function, low revascularization ratio, larger  
9 infarct size and inflammation were related to hyperglycemia on admission.  
10  
11

12  
13  
14  
15  
16 The results of the present study confirm the findings regarding a strong association between  
17 admission blood glucose and short-term mortality as well as in-hospital complications in AMI  
18 patients independent of diabetes status. Contrary to our study, prior studies did not evaluate  
19 how the relationship between admission glucose and outcomes varies between different age  
20 groups or other AMI subgroups in higher aged patients. The present study therefore expands  
21 the current understanding of the relevance of admission glucose regarding adverse outcomes  
22 in subgroups of older AMI patients. Further studies on this issue are necessary to confirm or  
23 refute our findings.  
24  
25  
26  
27  
28  
29  
30  
31

32 The present data indicated that admission glucose had different impacts on adverse short-  
33 term outcomes in elderly STEMI versus NSTEMI patients. Prior studies investigating the  
34 relevance of admission glucose on outcomes were mostly conducted in STEMI patients (28-  
35 30) or included both STEMI and NSTEMI patients (17, 31, 32); only a few studies were  
36 conducted in NSTEMI-samples (33). In addition, studies on this issue conducted in elderly AMI  
37 patients are scarce (34). For example, a meta-analysis including six cohort studies reported  
38 that elevated admission glucose ( $\geq$ 6.1-11.1 mmol/L) was significantly associated with short-  
39 term mortality in STEMI patients without diabetes (RR 4.38; 95% CI 3.23-5.94) (35). In another  
40 study conducted in NSTEMI patients undergoing PCI, admission blood glucose was a predictor  
41 of 30-day major adverse cardiovascular events (MACE), irrespective of diabetes status (33).  
42 Our results suggested that admission glucose might be a predictor of short-term mortality and  
43 in-hospital complications in older STEMI patients, while in NSTEMI patients it was associated  
44 with in-hospital complications only.  
45  
46  
47  
48  
49  
50  
51  
52  
53  
54  
55

56 The increased mortality related to high admission glucose levels in AMI patients has been  
57 linked to different pathophysiologic mechanisms. There is evidence for the toxic effects of  
58 hyperglycemia on cell function, because acute high blood glucose might induce oxidative  
59  
60

1  
2  
3 stress, most likely via generation of free radicals (2). Moreover, hyperglycemia inhibits  
4 metabolic processes in the myocardium and induces apoptosis in cardiomyocytes. Chang et  
5 al. (36) showed an association between high glucose level and sFas serum levels, which is a  
6 valuable biomarker of the physiological response to ischemia.  
7  
8  
9

10  
11 Stress hyperglycemia in myocardial infarction patients could also be associated with adverse  
12 outcomes due to its ability to increase systemic inflammation and activation of stress  
13 responsive kinases. Recently, Marfella et al. (37) demonstrated an association between  
14 inflammatory markers and functional cardiac outcome in patients with an incident myocardial  
15 infarction. In that study hyperglycemia was associated with amplified inflammatory immune  
16 reactions and worse functional cardiac outcome.  
17  
18  
19

20  
21 Moreover, hyperglycemia is strongly associated with impaired coronary flow before  
22 reperfusion and has been related to enhanced thrombin formation, platelet activation, and  
23 fibrin clot resistance to lysis. Hyperglycemia has been linked to increased sensitivity to  
24 ischemia-reperfusion injury (5, 38). These pathological processes may vary with age, that  
25 could explain, at least in part, our results.  
26  
27  
28  
29  
30  
31

32  
33 Another possible explanation for the findings in our study is related to the importance of age  
34 in this context, because it is a strong risk factor for cardiovascular disease and an independent  
35 risk factor for mortality and adverse outcomes after AMI. For example, Shechter et al. (39)  
36 demonstrated that AMI patients over 80 years had more major adverse cardiac events  
37 (including re-infarction, post-infarction angina, ischemic stroke, high-degree atrioventricular  
38 block, acute renal failure, and major bleeding) in-hospital and a four- to five-fold higher  
39 mortality rate than younger patients. Furthermore, age is related to frequent complications  
40 and side effects of treatment interventions and pharmacotherapy (40). Additionally, the  
41 hemodynamic impact of a given infarct size may be more pronounced in the elderly as a result  
42 of reduced cardiac reserve (41). There is also a greater likelihood of comorbid illnesses with  
43 advancing age, which contribute to poorer outcomes (42).  
44  
45  
46  
47  
48  
49  
50  
51  
52

### 53 *Strengths and limitations*

54  
55 Several important limitations of the present study should be acknowledged. First, our study  
56 was observational and nonrandomized by nature. Second, the analysis was limited to  
57 admission blood glucose values. Thus, there is a lack of information on the effect of in hospital  
58  
59  
60

1  
2  
3 treatment regarding hyperglycemia and hypoglycemia, and how glucose levels during hospital  
4 stay affected adverse outcomes. Third, it cannot be ruled out that some hyperglycemic  
5 patients without a history of diabetes are true diabetes cases who have not been diagnosed  
6 before. Fourth, although our multivariable analysis was adjusted for several risk factors,  
7 residual confounding cannot be entirely excluded. Finally, our study was limited to 65-84 years  
8 old German patients with incident AMI, therefore it remains uncertain if our results apply to  
9 other populations and age subgroups of patients.  
10  
11  
12  
13  
14  
15

16 The present study is characterized by several strengths. Data was collected within the  
17 framework of a population-based MI registry, and the consecutively admitted patients  
18 included from the general population presenting with first AMIs were registered according to  
19 a standardized protocol. Furthermore, important risk factors such as comorbidities, in-  
20 hospital treatment and complications were included in our analysis.  
21  
22  
23  
24  
25

### 26 *Conclusions*

27  
28 High admission blood glucose significantly increased the risk of short-term mortality and  
29 complications among older patients hospitalized with incident AMI independent of diabetes  
30 status. It could be shown, that admission glucose has a relatively small effect on 28-day-  
31 mortality among 75-84 years old patients compared to patients aged 65-74 years.  
32 Additionally, admission glucose seems to play a different role as predictor of 28-day mortality  
33 and in-hospital complications in older STEMI/NSTEMI patients. These findings underscore the  
34 importance of a closely glycaemic control during hospital stay particularly in certain subgroups  
35 of older AMI patients. More studies based on large samples are needed to further confirm this  
36 conclusion.  
37  
38  
39  
40  
41  
42  
43  
44  
45  
46  
47  
48  
49  
50  
51  
52  
53  
54  
55  
56  
57  
58  
59  
60



## Acknowledgments

The KORA study was initiated and financed by the Helmholtz Zentrum München – German Research Center for Environmental Health, which is funded by the German Federal Ministry of Education and Research (BMBF) and by the State of Bavaria.

### **Additionally for publications with genetic data or other omics data levels:**

Furthermore, KORA research was supported within the Munich Center of Health Sciences (MC-Health), Ludwig-Maximilians-Universität, as part of LMUinnovativ.

**Additionally for publications with data from KORA-Age:** The KORA-Age project was financed by the German Federal Ministry of Education and Research (BMBF FKZ 01ET0713 and 01ET1003A) as part of the ‘Health in old age’ program.

### **Financial support**

The KORA research platform (Cooperative Research in the Region of Augsburg) was initiated and financed by the Helmholtz Zentrum München - German Research Center for Environmental Health, which is funded by the German Federal Ministry of Education and Research and by the State of Bavaria. Since 2000, the acquisition of data in acute myocardial infarction patients is co-financed by the German Federal Ministry of Health and Social Security to provide population-based myocardial infarction morbidity and mortality data for the official German Health Report (see [www.gbe-bund.de](http://www.gbe-bund.de)).

### **Conflicts of interest**

No conflict of interest to declare.

### **Clinical trial name**

No trial name/ URL/ registration number assigned (observational study from a population-based registry)

## References

1. Goyal A, Mehta SR, Gerstein HC, Diaz R, Afzal R, Xavier D, et al. Glucose levels compared with diabetes history in the risk assessment of patients with acute myocardial infarction. *Am Heart J*. 2009;157(4):763-70.
2. Kosiborod M, Inzucchi SE, Krumholz HM, Xiao L, Jones PG, Fiske S, et al. Glucometrics in patients hospitalized with acute myocardial infarction: defining the optimal outcomes-based measure of risk. *Circulation*. 2008;117(8):1018-27.
3. Capes SE, Hunt D, Malmberg K, Gerstein HC. Stress hyperglycaemia and increased risk of death after myocardial infarction in patients with and without diabetes: a systematic overview. *Lancet*. 2000;355(9206):773-8.
4. Goyal A, Mahaffey KW, Garg J, Nicolau JC, Hochman JS, Weaver WD, et al. Prognostic significance of the change in glucose level in the first 24 h after acute myocardial infarction: results from the CARDINAL study. *Eur Heart J*. 2006;27(11):1289-97.
5. R.J. T. Hyperglycemia Is an Important Predictor of Impaired Coronary Flow Before Reperfusion Therapy in ST-Segment Elevation Myocardial Infarction. *Journal of the American College of Cardiology*. 2005;45(7):999-1002.
6. Iwakura K, Ito H, Ikushima M, Kawano S, Okamura A, Asano K, et al. Association between hyperglycemia and the no-reflow phenomenon in patients with acute myocardial infarction. *J Am Coll Cardiol*. 2003;41(1):1-7.
7. Cheng HH, Yen PC. Killip classification and glucose level in patients with acute myocardial infarction. *Am J Emerg Med*. 2010;28(8):853-6.
8. Hsu CW, Chen HH, Sheu WH, Chu SJ, Shen YS, Wu CP, et al. Initial serum glucose level as a prognostic factor in the first acute myocardial infarction. *Ann Emerg Med*. 2007;49(5):618-26.
9. Luis C.L. Correia MSR, Ana P. Bittencourt, Rafael Freitas, Alexandre C. Souza, Maria C. Almeida, J. Péricles Esteves. Does acute hyperglycemia add prognostic value to the GRACE score in individuals with non-ST elevation acute coronary syndromes? *Clinica Chimica Acta*. 2009;410,(1-2):74-8.
10. Timoteo AT, Papoila AL, Rio P, Miranda F, Ferreira ML, Ferreira RC. Prognostic impact of admission blood glucose for all-cause mortality in patients with acute coronary syndromes: added value on top of GRACE risk score. *Eur Heart J Acute Cardiovasc Care*. 2014;3(3):257-63.
11. Bellodi G, Manicardi V, Malavasi V, Veneri L, Bernini G, Bossini P, et al. Hyperglycemia and prognosis of acute myocardial infarction in patients without diabetes mellitus. *Am J Cardiol*. 1989;64(14):885-8.
12. O'Sullivan JJ, Conroy RM, Robinson K, Hickey N, Mulcahy R. In-hospital prognosis of patients with fasting hyperglycemia after first myocardial infarction. *Diabetes Care*. 1991;14(8):758-60.
13. Oswald GA, Smith CC, Betteridge DJ, Yudkin JS. Determinants and importance of stress hyperglycaemia in non-diabetic patients with myocardial infarction. *Br Med J (Clin Res Ed)*. 1986;293(6552):917-22.
14. Hadjadj S, Coisne D, Mauco G, Ragot S, Duengler F, Sosner P, et al. Prognostic value of admission plasma glucose and HbA in acute myocardial infarction. *Diabet Med*. 2004;21(4):305-10.
15. Sala J, Masia R, Gonzalez de Molina FJ, Fernandez-Real JM, Gil M, Bosch D, et al. Short-term mortality of myocardial infarction patients with diabetes or hyperglycaemia during admission. *J Epidemiol Community Health*. 2002;56(9):707-12.
16. Foo K, Cooper J, Deaner A, Knight C, Suliman A, Ranjadayalan K, et al. A single serum glucose measurement predicts adverse outcomes across the whole range of acute coronary syndromes. *Heart*. 2003;89(5):512-6.
17. Kosiborod M, Rathore SS, Inzucchi SE, Masoudi FA, Wang Y, Havranek EP, et al. Admission glucose and mortality in elderly patients hospitalized with acute myocardial infarction: implications for patients with and without recognized diabetes. *Circulation*. 2005;111(23):3078-86.
18. Kuch B, Heier M, von Scheidt W, Kling B, Hoermann A, Meisinger C. 20-year trends in clinical characteristics, therapy and short-term prognosis in acute myocardial infarction according to

- 1  
2  
3 presenting electrocardiogram: the MONICA/KORA AMI Registry (1985-2004). *J Intern Med.* 2008;264(3):254-64.
- 4  
5 19. Lowel H, Meisinger C, Heier M, Hormann A. The population-based acute myocardial infarction  
6 (AMI) registry of the MONICA/KORA study region of Augsburg. *Gesundheitswesen.* 2005;67 Suppl  
7 1:S31-7.
- 8  
9 20. Meisinger C, Hormann A, Heier M, Kuch B, Lowel H. Admission blood glucose and adverse  
10 outcomes in non-diabetic patients with myocardial infarction in the reperfusion era. *Int J Cardiol.*  
11 2006;113(2):229-35.
- 12  
13 21. Alpert JS, Thygesen K, Antman E, Bassand JP. Myocardial infarction redefined--a consensus  
14 document of The Joint European Society of Cardiology/American College of Cardiology Committee for  
15 the redefinition of myocardial infarction. *J Am Coll Cardiol.* 2000;36(3):959-69.
- 16  
17 22. Dziewierz A, Giszterowicz D, Siudak Z, Rakowski T, Dubiel JS, Dudek D. Admission glucose level  
18 and in-hospital outcomes in diabetic and non-diabetic patients with acute myocardial infarction. *Clin  
19 Res Cardiol.* 2010;99(11):715-21.
- 20  
21 23. Ishihara M. Acute hyperglycemia in patients with acute myocardial infarction. *Circ J.*  
22 2012;76(3):563-71.
- 23  
24 24. Kim EJ, Jeong MH, Kim JH, Ahn TH, Seung KB, Oh DJ, et al. Clinical impact of admission  
25 hyperglycemia on in-hospital mortality in acute myocardial infarction patients. *Int J Cardiol.*  
26 2017;236:9-15.
- 27  
28 25. Ding XS, Wu SS, Chen H, Zhao XQ, Li HW. High admission glucose levels predict worse short-  
29 term clinical outcome in non-diabetic patients with acute myocardial infarction: a retrospective  
30 observational study. *BMC Cardiovasc Disord.* 2019;19(1):163.
- 31  
32 26. Fujino M, Ishihara M, Honda S, Kawakami S, Yamane T, Nagai T, et al. Impact of acute and  
33 chronic hyperglycemia on in-hospital outcomes of patients with acute myocardial infarction. *Am J  
34 Cardiol.* 2014;114(12):1789-93.
- 35  
36 27. Zhao S, Murugiah K, Li N, Li X, Xu ZH, Li J, et al. Admission Glucose and In-hospital Mortality  
37 after Acute Myocardial Infarction in Patients with or without Diabetes: A Cross-sectional Study. *Chin  
38 Med J (Engl).* 2017;130(7):767-75.
- 39  
40 28. Li DB, Hua Q, Guo J, Li HW, Chen H, Zhao SM. Admission glucose level and in-hospital outcomes  
41 in diabetic and non-diabetic patients with ST-elevation acute myocardial infarction. *Intern Med.*  
42 2011;50(21):2471-5.
- 43  
44 29. Chen PC, Chua SK, Hung HF, Huang CY, Lin CM, Lai SM, et al. Admission hyperglycemia predicts  
45 poorer short- and long-term outcomes after primary percutaneous coronary intervention for ST-  
46 elevation myocardial infarction. *J Diabetes Investig.* 2014;5(1):80-6.
- 47  
48 30. Pinto DS, Kirtane AJ, Pride YB, Murphy SA, Sabatine MS, Cannon CP, et al. Association of blood  
49 glucose with angiographic and clinical outcomes among patients with ST-segment elevation  
50 myocardial infarction (from the CLARITY-TIMI-28 study). *Am J Cardiol.* 2008;101(3):303-7.
- 51  
52 31. Norhammar A, Tenerz A, Nilsson G, Hamsten A, Efendic S, Ryden L, et al. Glucose metabolism  
53 in patients with acute myocardial infarction and no previous diagnosis of diabetes mellitus: a  
54 prospective study. *Lancet.* 2002;359(9324):2140-4.
- 55  
56 32. Stranders I, Diamant M, van Gelder RE, Spruijt HJ, Twisk JW, Heine RJ, et al. Admission blood  
57 glucose level as risk indicator of death after myocardial infarction in patients with and without diabetes  
58 mellitus. *Arch Intern Med.* 2004;164(9):982-8.
- 59  
60 33. Hao Y, Lu Q, Li T, Yang G, Hu P, Ma A. Admission hyperglycemia and adverse outcomes in  
diabetic and non-diabetic patients with non-ST-elevation myocardial infarction undergoing  
percutaneous coronary intervention. *BMC Cardiovasc Disord.* 2017;17(1):6.
34. Otten AM, Ottervanger JP, Timmer JR, van 't Hof AW, Dambrink JH, Gosselink AM, et al. Age-  
dependent differences in diabetes and acute hyperglycemia between men and women with ST-  
elevation myocardial infarction: a cohort study. *Diabetol Metab Syndr.* 2013;5(1):34.
35. Zhao CJ, Hao ZX, Liu R, Liu Y. Admission glucose and risk of early death in non-diabetic patients  
with ST-segment elevation myocardial infarction: a meta-analysis. *Med Sci Monit.* 2015;21:1387-94.

- 1  
2  
3 36. Chang J, Zhang G, Zhang L, Hou YP, Liu XL, Zhang L. High admission glucose levels increase Fas  
4 apoptosis and mortality in patients with acute ST-elevation myocardial infarction: a prospective cohort  
5 study. *Cardiovasc Diabetol*. 2013;12:171.  
6  
7 37. Marfella R, Siniscalchi M, Esposito K, Sellitto A, De Fanis U, Romano C, et al. Effects of stress  
8 hyperglycemia on acute myocardial infarction: role of inflammatory immune process in functional  
9 cardiac outcome. *Diabetes Care*. 2003;26(11):3129-35.  
10  
11 38. Undas A, Wiek I, Stepień E, Zmudka K, Tracz W. Hyperglycemia is associated with enhanced  
12 thrombin formation, platelet activation, and fibrin clot resistance to lysis in patients with acute  
13 coronary syndrome. *Diabetes Care*. 2008;31(8):1590-5.  
14  
15 39. Shechter M, Rubinstein R, Goldenberg I, Matetzki S, Acute Coronary Syndrome Israel S.  
16 Comparison of Outcomes of Acute Coronary Syndrome in Patients  $\geq 80$  Years Versus Those  $< 80$  Years  
17 in Israel from 2000 to 2013. *Am J Cardiol*. 2017;120(8):1230-7.  
18  
19 40. Stone PH, Thompson B, Anderson HV, Kronenberg MW, Gibson RS, Rogers WJ, et al. Influence  
20 of race, sex, and age on management of unstable angina and non-Q-wave myocardial infarction: The  
21 TIMI III registry. *JAMA*. 1996;275(14):1104-12.  
22  
23 41. De Carlo M, Morici N, Savonitto S, Grassia V, Sbarzaglia P, Tamburrini P, et al. Sex-Related  
24 Outcomes in Elderly Patients Presenting With Non-ST-Segment Elevation Acute Coronary Syndrome:  
25 Insights From the Italian Elderly ACS Study. *JACC Cardiovasc Interv*. 2015;8(6):791-6.  
26  
27 42. Gudnadottir GS, James SK, Andersen K, Lagerqvist B, Thrainsdottir IS, Ravn-Fischer A, et al.  
28 Outcomes after STEMI in old multimorbid patients with complex health needs and the effect of  
29 invasive management. *Am Heart J*. 2019;211:11-21.  
30  
31  
32  
33  
34  
35  
36  
37  
38  
39  
40  
41  
42  
43  
44  
45  
46  
47  
48  
49  
50  
51  
52  
53  
54  
55  
56  
57  
58  
59  
60

**Table 1.** Characteristics of the AMI patients by age groups.

|                       | Age groups     |                | p-value | Total sample<br>(n=5530) |
|-----------------------|----------------|----------------|---------|--------------------------|
|                       | 65-74 (n=3709) | 75-84 (n=1821) |         |                          |
| <b>Female sex</b>     | 1185 (31.9%)   | 831 (45.6%)    | <0.001  | 2016 (36.5%)             |
| <b>Hypertension</b>   | 3060 (82.5%)   | 1602 (88.0%)   | <0.001  | 4662 (84.3%)             |
| <b>Lipid disorder</b> | 2238 (60.3%)   | 906 (49.8%)    | <0.001  | 3144 (56.9%)             |
| <b>Smoking status</b> |                |                |         |                          |
| Smoker                | 674 (18.2%)    | 121 (6.6%)     |         | 795 (14.4%)              |
| Ex-smoker             | 1245 (33.6%)   | 533 (29.3%)    |         | 1778 (32.2%)             |
| Never-smoker          | 1291 (34.8%)   | 792 (43.5%)    |         | 2083 (37.7%)             |
| Missing               | 499 (13.5%)    | 375 (20.6%)    |         | 874 (15.8%)              |

|    |                                                   |              |             |        |              |
|----|---------------------------------------------------|--------------|-------------|--------|--------------|
| 1  |                                                   |              |             |        |              |
| 2  |                                                   |              |             |        |              |
| 3  |                                                   |              |             |        |              |
| 4  |                                                   |              |             |        |              |
| 5  | <b>Glucose level on admission (mg/dl) [Median</b> |              |             |        |              |
| 6  |                                                   | 92.0 (71.0)  | 97.0 (71.0) | 0.521  | 94.0 (70.0)  |
| 7  |                                                   |              |             |        |              |
| 8  | (IQR)]                                            |              |             |        |              |
| 9  |                                                   |              |             |        |              |
| 10 |                                                   |              |             |        |              |
| 11 | <b>Peak glucose level (mg/dl) [Median (IQR)]</b>  | 98.0 (60.0)  | 95.0 (81)   | <0.001 | 97.0 (87.0)  |
| 12 |                                                   |              |             |        |              |
| 13 |                                                   |              |             |        |              |
| 14 | <b>Cardiac arrest before hospitalization</b>      | 147 (4.0%)   | 41 (2.3%)   |        | 188 (3.4%)   |
| 15 |                                                   |              |             |        |              |
| 16 |                                                   |              |             |        |              |
| 17 | Missing                                           | 220 (5.9%)   | 159 (8.7%)  |        | 379 (6.9%)   |
| 18 |                                                   |              |             |        |              |
| 19 |                                                   |              |             |        |              |
| 20 | <b>LVEF &lt; 30%</b>                              | 197 (5.3%)   | 169 (9.3%)  |        | 366 (6.6%)   |
| 21 |                                                   |              |             |        |              |
| 22 |                                                   |              |             |        |              |
| 23 |                                                   |              |             |        |              |
| 24 | Missing                                           | 987 (26.6%)  | 288 (15.8%) |        | 1275 (23.1%) |
| 25 |                                                   |              |             |        |              |
| 26 |                                                   |              |             |        |              |
| 27 | <b>Diabetes</b>                                   | 1376 (37.1%) | 721 (39.6%) | 0.077  | 2097 (37.9%) |
| 28 |                                                   |              |             |        |              |
| 29 |                                                   |              |             |        |              |
| 30 | <b>STEMI</b>                                      |              |             |        |              |
| 31 |                                                   |              |             |        |              |
| 32 |                                                   |              |             |        |              |
| 33 | STEMI                                             | 1189 (32.1%) | 440 (24.2%) | <0.001 | 1629 (29.5%) |
| 34 |                                                   |              |             |        |              |
| 35 |                                                   |              |             |        |              |
| 36 | NSTEMI                                            | 1967 (53.0%) | 898 (49.3%) |        | 2865 (51.8%) |
| 37 |                                                   |              |             |        |              |
| 38 |                                                   |              |             |        |              |
| 39 |                                                   |              |             |        |              |
| 40 |                                                   |              |             |        |              |
| 41 |                                                   |              |             |        |              |
| 42 |                                                   |              |             |        |              |
| 43 |                                                   |              |             |        |              |
| 44 |                                                   |              |             |        |              |
| 45 |                                                   |              |             |        |              |
| 46 |                                                   |              |             |        |              |

|    |                                                                                                                                                                           |              |              |              |
|----|---------------------------------------------------------------------------------------------------------------------------------------------------------------------------|--------------|--------------|--------------|
| 1  |                                                                                                                                                                           |              |              |              |
| 2  |                                                                                                                                                                           |              |              |              |
| 3  |                                                                                                                                                                           |              |              |              |
| 4  |                                                                                                                                                                           |              |              |              |
| 5  | Bundle branch block                                                                                                                                                       | 316 (8.5%)   | 220 (12.1%)  | 536 (9.7%)   |
| 6  |                                                                                                                                                                           |              |              |              |
| 7  |                                                                                                                                                                           |              |              |              |
| 8  | Not defined                                                                                                                                                               | 237 (6.4%)   | 263 (14.4%)  | 500 (9.0%)   |
| 9  |                                                                                                                                                                           |              |              |              |
| 10 |                                                                                                                                                                           |              |              |              |
| 11 | <b>Typical symptoms</b>                                                                                                                                                   | 2896 (78.1%) | 1218 (66.9%) | 4114 (74.4%) |
| 12 |                                                                                                                                                                           |              |              |              |
| 13 |                                                                                                                                                                           |              |              |              |
| 14 | Missing                                                                                                                                                                   | 54 (1.5%)    | 29 (1.6%)    | 83 (1.5%)    |
| 15 |                                                                                                                                                                           |              |              |              |
| 16 |                                                                                                                                                                           |              |              |              |
| 17 | <hr/>                                                                                                                                                                     |              |              |              |
| 18 |                                                                                                                                                                           |              |              |              |
| 19 | AMI – acute myocardial infarction, IQR – interquartile range, STEMI – ST-segment elevation myocardial infarction, NSTEMI – Non-ST-segment elevation myocardial infarction |              |              |              |
| 20 |                                                                                                                                                                           |              |              |              |
| 21 |                                                                                                                                                                           |              |              |              |
| 22 |                                                                                                                                                                           |              |              |              |
| 23 |                                                                                                                                                                           |              |              |              |
| 24 |                                                                                                                                                                           |              |              |              |
| 25 |                                                                                                                                                                           |              |              |              |
| 26 |                                                                                                                                                                           |              |              |              |
| 27 |                                                                                                                                                                           |              |              |              |
| 28 |                                                                                                                                                                           |              |              |              |
| 29 |                                                                                                                                                                           |              |              |              |
| 30 |                                                                                                                                                                           |              |              |              |
| 31 |                                                                                                                                                                           |              |              |              |
| 32 |                                                                                                                                                                           |              |              |              |
| 33 |                                                                                                                                                                           |              |              |              |
| 34 |                                                                                                                                                                           |              |              |              |
| 35 |                                                                                                                                                                           |              |              |              |
| 36 |                                                                                                                                                                           |              |              |              |
| 37 |                                                                                                                                                                           |              |              |              |
| 38 |                                                                                                                                                                           |              |              |              |
| 39 |                                                                                                                                                                           |              |              |              |
| 40 |                                                                                                                                                                           |              |              |              |
| 41 |                                                                                                                                                                           |              |              |              |
| 42 |                                                                                                                                                                           |              |              |              |
| 43 |                                                                                                                                                                           |              |              |              |
| 44 |                                                                                                                                                                           |              |              |              |
| 45 |                                                                                                                                                                           |              |              |              |
| 46 |                                                                                                                                                                           |              |              |              |

AMI – acute myocardial infarction, IQR – interquartile range, STEMI – ST-segment elevation myocardial infarction, NSTEMI – Non-ST-segment elevation myocardial infarction

**Table 2.** Treatment of AMI patients during hospital stay by age groups

|                                               | Age groups     |                | p-value | Total sample<br>(n=5530) |
|-----------------------------------------------|----------------|----------------|---------|--------------------------|
|                                               | 65-74 (n=3709) | 75-84 (n=1821) |         |                          |
| <b>Drug treatment of AMI patients</b>         |                |                |         |                          |
| Anticoagulants                                | 3661 (98.7%)   | 1806 (99.1%)   | 0.158   | 5467 (98.8%)             |
| Ca-antagonists                                | 1343 (36.2%)   | 748 (41.1%)    | <0.001  | 2091 (37.8%)             |
| ACE inhibitors                                | 3007 (81.1%)   | 1337 (73.4%)   | <0.001  | 4344 (78.5%)             |
| Beta-blockers                                 | 3492 (94.1%)   | 1683 (92.4%)   | 0.016   | 5175 (93.6%)             |
| Nitrates                                      | 2948 (79.5%)   | 1237 (67.9%)   | <0.001  | 4185 (75.7%)             |
| Angiotensin II antagonists                    | 404 (10.9%)    | 327 (17.9%)    | <0.001  | 731 (13.2%)              |
| Other antihypertensives                       | 635 (17.1%)    | 395 (21.7%)    | <0.001  | 1030 (18.6%)             |
| Statins                                       | 3284 (88.5%)   | 1614 (88.6%)   | 0.956   | 4898 (88.6%)             |
| Insulin                                       | 1250 (33.7%)   | 610 (33.5%)    | 0.904   | 1860 (33.6%)             |
| <b>Recanalization therapy of AMI-patients</b> |                |                |         |                          |
| At least one recanalization therapy           | 2941 (79.3%)   | 1271 (69.8%)   | <0.001  | 4212 (76.2%)             |
| PCI                                           | 2294 (61.8%)   | 1064 (58.4%)   | 0.015   | 3358 (60.7%)             |



1  
2  
3  
4  
5  
6  
7  
8  
9  
10  
11  
12  
13  
14  
15  
16  
17  
18  
19  
20  
21  
22  
23  
24  
25  
26  
27  
28  
29  
30  
31  
32  
33  
34  
35  
36  
37  
38  
39  
40  
41  
42  
43  
44  
45  
46

|                      |             |             |        |             |
|----------------------|-------------|-------------|--------|-------------|
| Bypass               | 672 (18.1%) | 236 (13.0%) | <0.001 | 908 (16.4%) |
| Thrombolytic therapy | 160 (4.3%)  | 8 (0.4%)    | <0.001 | 168 (3.0%)  |

---

AMI – acute myocardial infarction, ACE – Angiotensin-converting enzyme, ASS - PTCA – Percutaneous transluminal coronary angioplasty

For peer review only

**Table 3.** Complications in AMI patients by age groups.

| Major complications        | Age groups     |                | p-value | Total sample<br>(n=5530) |
|----------------------------|----------------|----------------|---------|--------------------------|
|                            | 65-74 (n=3709) | 75-84 (n=1821) |         |                          |
| Cardiac arrest in hospital | 403 (10.9%)    | 256 (14.1%)    | <0.001  | 659 (11.9%)              |
| Cardiogenic shock          | 253 (6.8%)     | 149 (8.2%)     | 0.075   | 402 (7.3%)               |
| Pulmonary edema            | 172 (4.6%)     | 85 (4.7%)      | 1       | 257 (4.6%)               |
| Bradycardia                | 225 (6.1%)     | 99 (5.4%)      | 0.380   | 324 (5.9%)               |
| Ventricular fibrillation   | 121 (3.3%)     | 50 (2.7%)      | 0.336   | 171 (3.1%)               |
| Ventricular tachycardia    | 149 (4.0%)     | 82 (4.5%)      | 0.437   | 231 (4.2%)               |
| Re-infarction              | 92 (2.5%)      | 33 (1.8%)      | 0.140   | 125 (2.3%)               |
| 28-day case fatality       | 292 (7.9%)     | 209 (11.5%)    | <0.001  | 501(9.1%)                |

AMI – acute myocardial infarction

**Table 4.** Association of admission blood glucose levels (per 1 SD increase) with 28-day case fatality and major complications.

|                     | 28-day case fatality |         |                  |         | In-hospital complications |         |                  |         |
|---------------------|----------------------|---------|------------------|---------|---------------------------|---------|------------------|---------|
|                     | OR* (95% CI)         | p-value | OR** (95% CI)    | p-value | OR* (95% CI)              | p-value | OR*** (95%CI)    | p-value |
| <b>Total sample</b> | 1.59 (1.48-1.70)     | <0.0001 | 1.33 (1.21-1.63) | <0.0001 | 1.39 (1.31-1.47)          | <0.0001 | 1.26 (1.17-1.35) | <0.0001 |
| 65-74 years         | 1.66 (1.51-1.82)     | <0.0001 | 1.41 (1.21-1.64) | <0.0001 | 1.35 (1.26-1.45)          | <0.0001 | 1.23 (1.13-1.34) | <0.0001 |
| 75-84 years         | 1.47 (1.29-1.66)     | <0.0001 | 1.21 (1.00-1.50) | 0.1     | 1.45 (1.31-1.61)          | <0.0001 | 1.31 (1.16-1.48) | <0.0001 |
| <b>Diabetes</b>     |                      |         |                  |         |                           |         |                  |         |
| Total sample        | 1.42 (1.23-1.57)     | <0.0001 | 1.33 (1.18-1.50) | <0.0001 | 1.45 (1.30-1.63)          | <0.0001 | 1.26 (1.11-1.43) | 0.0003  |
| 65-74 years         | 1.44 (1.26-1.63)     | <0.0001 | 1.28 (1.06-1.55) | <0.001  | 1.36 (1.18-1.57)          | <0.0001 | 1.18 (1.01-1.37) | 0.0310  |
| 75-84 years         | 1.37 (1.14-1.63)     | <0.001  | 1.09 (0.83-1.45) | 0.1     | 1.64 (1.36-1.99)          | <0.0001 | 1.43 (1.15-1.79) | 0.0014  |
| <b>No diabetes</b>  |                      |         |                  |         |                           |         |                  |         |
| Total sample        | 2.68 (2.31-3.13)     | <0.0001 | 1.75 (1.41-2.17) | <0.0001 | 1.49 (1.38-1.60)          | <0.0001 | 1.34(1.24-1.45)  | <0.0001 |
| 65-74 years         | 2.83 (2.34-3.44)     | <0.0001 | 1.88 (1.45-2.46) | <0.0001 | 1.47 (1.35-1.61)          | <0.0001 | 1.36 (1.24-1.49) | <0.0001 |
| 75-84 years         | 2.45 (1.91-3.15)     | <0.0001 | 1.50 (1.03-2.19) | <0.01   | 1.50 (1.31-1.73)          | <0.0001 | 1.49(1.18-1.88)  | <0.0001 |
| <b>STEMI</b>        |                      |         |                  |         |                           |         |                  |         |

|    |               |                  |         |                  |         |                  |         |                  |        |
|----|---------------|------------------|---------|------------------|---------|------------------|---------|------------------|--------|
| 1  |               |                  |         |                  |         |                  |         |                  |        |
| 2  |               |                  |         |                  |         |                  |         |                  |        |
| 3  |               |                  |         |                  |         |                  |         |                  |        |
| 4  | Total sample  | 1.87 (1.62-2.16) | <0.0001 | 1.83(1.43-2.36)  | <0.0001 | 1.35 (1.22-1.50) | <0.0001 | 1.24 (1.09-1.41) | 0.0010 |
| 5  |               |                  |         |                  |         |                  |         |                  |        |
| 6  | 65-74 years   | 1.91 (1.61-2.27) | <0.0001 | 1.96 (1.46-2.66) | <0.0001 | 1.25 (1.11-1.41) | <0.0001 | 1.13 (0.98-1.31) | 0.0828 |
| 7  |               |                  |         |                  |         |                  |         |                  |        |
| 8  | 75-84 years   | 1.79 (1.38-2.34) | <0.0001 | 1.73 (1.06-2.88) | <0.01   | 1.75 (1.39-2.20) | <0.0001 | 1.67 (1.24-2.26) | 0.0007 |
| 9  |               |                  |         |                  |         |                  |         |                  |        |
| 10 |               |                  |         |                  |         |                  |         |                  |        |
| 11 | <b>NSTEMI</b> |                  |         |                  |         |                  |         |                  |        |
| 12 |               |                  |         |                  |         |                  |         |                  |        |
| 13 | Total sample  | 1.54 (1.39-1.71) | <0.0001 | 1.16 (0.98-1.37) | 0.05    | 1.37 (1.26-1.48) | <0.0001 | 1.19 (1.08-1.31) | 0.0004 |
| 14 |               |                  |         |                  |         |                  |         |                  |        |
| 15 | 65-74 years   | 1.60 (1.40-1.82) | <0.0001 | 1.22 (0.99-1.51) | 0.05    | 1.32 (1.20-1.46) | <0.0001 | 1.16 (1.03-1.30) | 0.0136 |
| 16 |               |                  |         |                  |         |                  |         |                  |        |
| 17 | 75-84 years   | 1.45 (1.22-1.72) | <0.0001 | 1.04 (0.77-1.42) | 0.1     | 1.46 (1.26-1.68) | <0.0001 | 1.24 (1.04-1.47) | 0.0129 |
| 18 |               |                  |         |                  |         |                  |         |                  |        |
| 19 |               |                  |         |                  |         |                  |         |                  |        |

OR\* - adjusted for sex, age

OR\*\* - adjusted for sex, age, diabetes, reperfusion therapy, drug treatment (treatment with angiotensin-converting enzyme (ACE) inhibitor (yes/no), beta-blocker (yes/no), lipid-lowering drug (yes/no), and antiplatelets during hospital stay (yes/no), insulin (yes/no), complications (recurrent infarction, ventricular fibrillation, ventricular tachycardia, bradycardia, pulmonary edema and cardiogenic shock, cardiac arrest during hospital stay).

OR\*\*\* - adjusted for sex, age, diabetes, reperfusion therapy, drug treatment (treatment with angiotensin-converting enzyme (ACE) inhibitor (yes/no), beta-blocker (yes/no), lipid-lowering drug (yes/no), and antiplatelets during hospital stay (yes/no), insulin (yes/no).

**Figure 1.** Flow chart diagram of study sample selection

Inclusion process for study sample with numbers and reasons for excluding patients from the original data set.

For peer review only

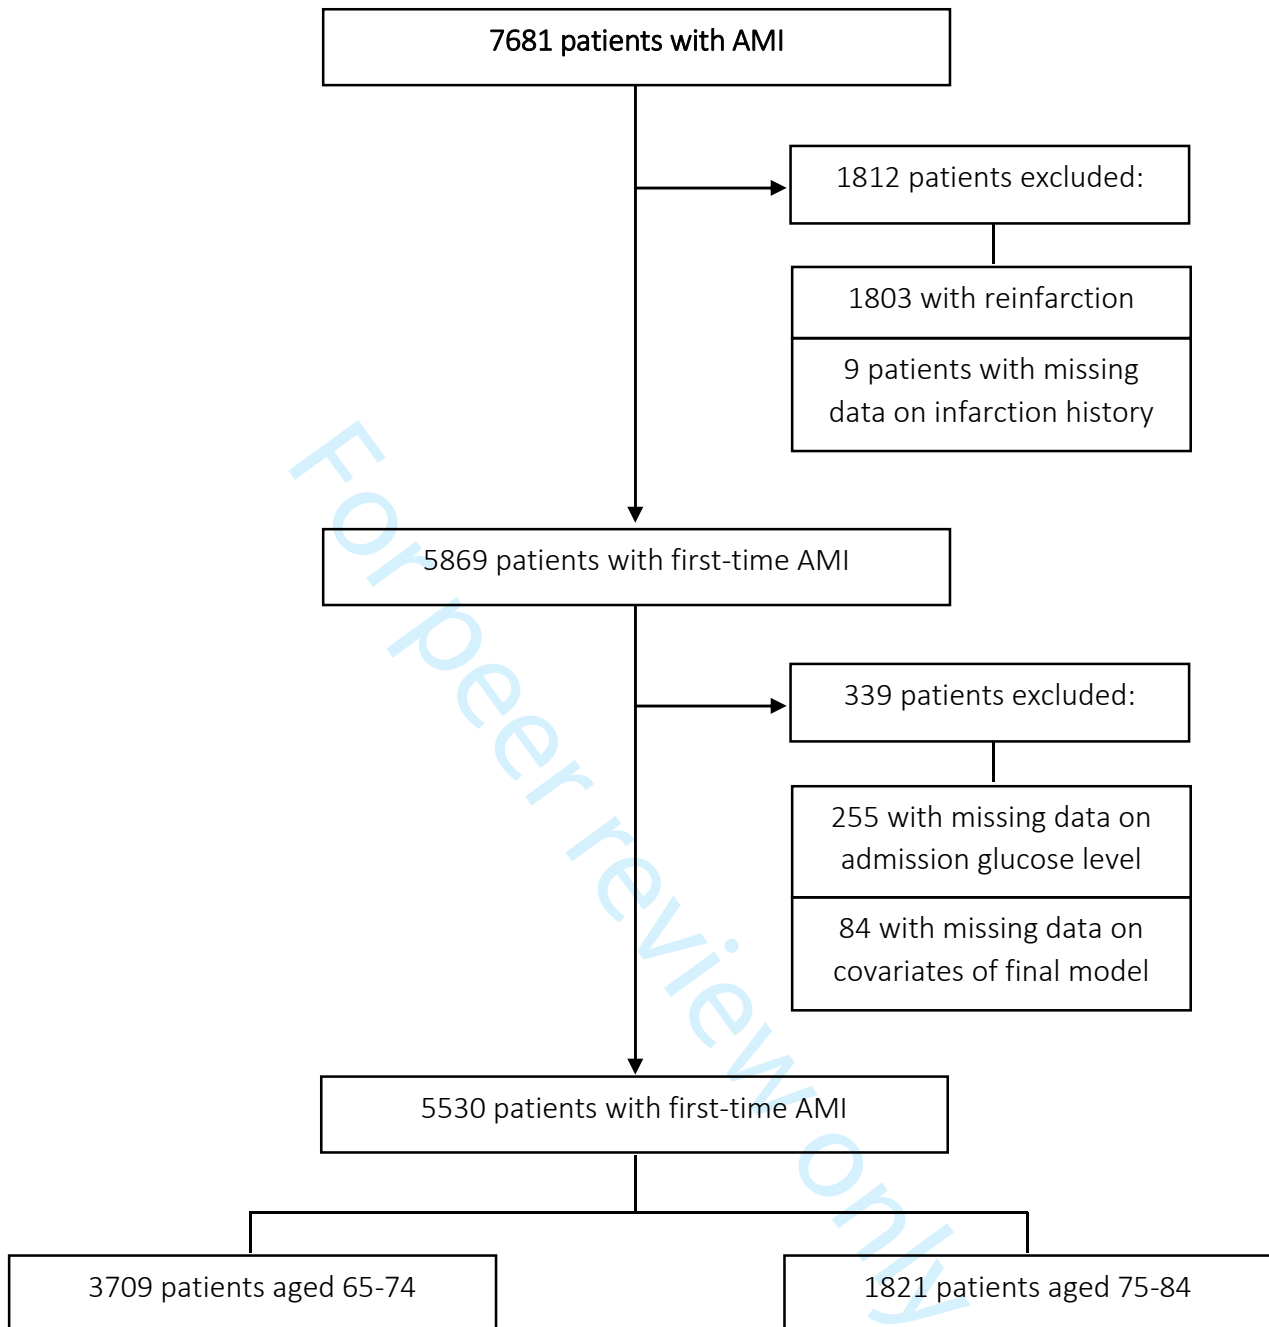

## STROBE Statement—checklist of items that should be included in reports of observational studies

|                              | Item No | Recommendation                                                                                                                                                                                                                                                                                                                                                                                                                                                         | Page No |
|------------------------------|---------|------------------------------------------------------------------------------------------------------------------------------------------------------------------------------------------------------------------------------------------------------------------------------------------------------------------------------------------------------------------------------------------------------------------------------------------------------------------------|---------|
| <b>Title and abstract</b>    | 1       | (a) Indicate the study's design with a commonly used term in the title or the abstract                                                                                                                                                                                                                                                                                                                                                                                 | 1       |
|                              |         | (b) Provide in the abstract an informative and balanced summary of what was done and what was found                                                                                                                                                                                                                                                                                                                                                                    |         |
| <b>Introduction</b>          |         |                                                                                                                                                                                                                                                                                                                                                                                                                                                                        |         |
| Background/rationale         | 2       | Explain the scientific background and rationale for the investigation being reported                                                                                                                                                                                                                                                                                                                                                                                   | 4       |
| Objectives                   | 3       | State specific objectives, including any prespecified hypotheses                                                                                                                                                                                                                                                                                                                                                                                                       | 4       |
| <b>Methods</b>               |         |                                                                                                                                                                                                                                                                                                                                                                                                                                                                        |         |
| Study design                 | 4       | Present key elements of study design early in the paper                                                                                                                                                                                                                                                                                                                                                                                                                | 5       |
| Setting                      | 5       | Describe the setting, locations, and relevant dates, including periods of recruitment, exposure, follow-up, and data collection                                                                                                                                                                                                                                                                                                                                        | 5       |
| Participants                 | 6       | (a) <i>Cohort study</i> —Give the eligibility criteria, and the sources and methods of selection of participants. Describe methods of follow-up<br><i>Case-control study</i> —Give the eligibility criteria, and the sources and methods of case ascertainment and control selection. Give the rationale for the choice of cases and controls<br><i>Cross-sectional study</i> —Give the eligibility criteria, and the sources and methods of selection of participants | 5,6     |
|                              |         | (b) <i>Cohort study</i> —For matched studies, give matching criteria and number of exposed and unexposed<br><i>Case-control study</i> —For matched studies, give matching criteria and the number of controls per case                                                                                                                                                                                                                                                 |         |
| Variables                    | 7       | Clearly define all outcomes, exposures, predictors, potential confounders, and effect modifiers. Give diagnostic criteria, if applicable                                                                                                                                                                                                                                                                                                                               | 6       |
| Data sources/<br>measurement | 8*      | For each variable of interest, give sources of data and details of methods of assessment (measurement). Describe comparability of assessment methods if there is more than one group                                                                                                                                                                                                                                                                                   | 5       |
| Bias                         | 9       | Describe any efforts to address potential sources of bias                                                                                                                                                                                                                                                                                                                                                                                                              |         |
| Study size                   | 10      | Explain how the study size was arrived at                                                                                                                                                                                                                                                                                                                                                                                                                              | 6       |
| Quantitative variables       | 11      | Explain how quantitative variables were handled in the analyses. If applicable, describe which groupings were chosen and why                                                                                                                                                                                                                                                                                                                                           |         |
| Statistical methods          | 12      | (a) Describe all statistical methods, including those used to control for confounding                                                                                                                                                                                                                                                                                                                                                                                  | 6,7     |
|                              |         | (b) Describe any methods used to examine subgroups and interactions                                                                                                                                                                                                                                                                                                                                                                                                    |         |
|                              |         | (c) Explain how missing data were addressed                                                                                                                                                                                                                                                                                                                                                                                                                            |         |
|                              |         | (d) <i>Cohort study</i> —If applicable, explain how loss to follow-up was addressed<br><i>Case-control study</i> —If applicable, explain how matching of cases and controls was addressed<br><i>Cross-sectional study</i> —If applicable, describe analytical methods taking account of sampling strategy                                                                                                                                                              |         |
|                              |         | (e) Describe any sensitivity analyses                                                                                                                                                                                                                                                                                                                                                                                                                                  |         |

Continued on next page

| <b>Results</b>           |     |                                                                                                                                                                                                                                                                                                                     |       |
|--------------------------|-----|---------------------------------------------------------------------------------------------------------------------------------------------------------------------------------------------------------------------------------------------------------------------------------------------------------------------|-------|
| Participants             | 13* | (a) Report numbers of individuals at each stage of study—eg numbers potentially eligible, examined for eligibility, confirmed eligible, included in the study, completing follow-up, and analysed                                                                                                                   | 8     |
|                          |     | (b) Give reasons for non-participation at each stage                                                                                                                                                                                                                                                                |       |
|                          |     | (c) Consider use of a flow diagram                                                                                                                                                                                                                                                                                  |       |
| Descriptive data         | 14* | (a) Give characteristics of study participants (eg demographic, clinical, social) and information on exposures and potential confounders<br>(b) Indicate number of participants with missing data for each variable of interest<br>(c) <i>Cohort study</i> —Summarise follow-up time (eg, average and total amount) | 8     |
| Outcome data             | 15* | <i>Cohort study</i> —Report numbers of outcome events or summary measures over time                                                                                                                                                                                                                                 | 8     |
|                          |     | <i>Case-control study</i> —Report numbers in each exposure category, or summary measures of exposure                                                                                                                                                                                                                |       |
|                          |     | <i>Cross-sectional study</i> —Report numbers of outcome events or summary measures                                                                                                                                                                                                                                  |       |
| Main results             | 16  | (a) Give unadjusted estimates and, if applicable, confounder-adjusted estimates and their precision (eg, 95% confidence interval). Make clear which confounders were adjusted for and why they were included                                                                                                        | 8,9   |
|                          |     | (b) Report category boundaries when continuous variables were categorized                                                                                                                                                                                                                                           |       |
|                          |     | (c) If relevant, consider translating estimates of relative risk into absolute risk for a meaningful time period                                                                                                                                                                                                    |       |
| Other analyses           | 17  | Report other analyses done—eg analyses of subgroups and interactions, and sensitivity analyses                                                                                                                                                                                                                      |       |
| <b>Discussion</b>        |     |                                                                                                                                                                                                                                                                                                                     |       |
| Key results              | 18  | Summarise key results with reference to study objectives                                                                                                                                                                                                                                                            | 10-13 |
| Limitations              | 19  | Discuss limitations of the study, taking into account sources of potential bias or imprecision. Discuss both direction and magnitude of any potential bias                                                                                                                                                          | 12    |
| Interpretation           | 20  | Give a cautious overall interpretation of results considering objectives, limitations, multiplicity of analyses, results from similar studies, and other relevant evidence                                                                                                                                          | 10-13 |
| Generalisability         | 21  | Discuss the generalisability (external validity) of the study results                                                                                                                                                                                                                                               | 13    |
| <b>Other information</b> |     |                                                                                                                                                                                                                                                                                                                     |       |
| Funding                  | 22  | Give the source of funding and the role of the funders for the present study and, if applicable, for the original study on which the present article is based                                                                                                                                                       | 14    |

\*Give information separately for cases and controls in case-control studies and, if applicable, for exposed and unexposed groups in cohort and cross-sectional studies.

**Note:** An Explanation and Elaboration article discusses each checklist item and gives methodological background and published examples of transparent reporting. The STROBE checklist is best used in conjunction with this article (freely available on the Web sites of PLoS Medicine at <http://www.plosmedicine.org/>, Annals of Internal Medicine at <http://www.annals.org/>, and Epidemiology at <http://www.epidem.com/>). Information on the STROBE Initiative is available at [www.strobe-statement.org](http://www.strobe-statement.org).



# BMJ Open

## Admission glucose level and short-term mortality in older patients with acute myocardial infarction: results from the KORA myocardial infarction registry

|                                 |                                                                                                                                                                                                                                                                                                                                                                                                                                                                                                                                                                                                                                                                                                                                                                                                                                                                                                                                                                                                                                                                                                                                                                                                                                                                                                                                                                                            |
|---------------------------------|--------------------------------------------------------------------------------------------------------------------------------------------------------------------------------------------------------------------------------------------------------------------------------------------------------------------------------------------------------------------------------------------------------------------------------------------------------------------------------------------------------------------------------------------------------------------------------------------------------------------------------------------------------------------------------------------------------------------------------------------------------------------------------------------------------------------------------------------------------------------------------------------------------------------------------------------------------------------------------------------------------------------------------------------------------------------------------------------------------------------------------------------------------------------------------------------------------------------------------------------------------------------------------------------------------------------------------------------------------------------------------------------|
| Journal:                        | <i>BMJ Open</i>                                                                                                                                                                                                                                                                                                                                                                                                                                                                                                                                                                                                                                                                                                                                                                                                                                                                                                                                                                                                                                                                                                                                                                                                                                                                                                                                                                            |
| Manuscript ID                   | bmjopen-2020-046641.R1                                                                                                                                                                                                                                                                                                                                                                                                                                                                                                                                                                                                                                                                                                                                                                                                                                                                                                                                                                                                                                                                                                                                                                                                                                                                                                                                                                     |
| Article Type:                   | Original research                                                                                                                                                                                                                                                                                                                                                                                                                                                                                                                                                                                                                                                                                                                                                                                                                                                                                                                                                                                                                                                                                                                                                                                                                                                                                                                                                                          |
| Date Submitted by the Author:   | 01-May-2021                                                                                                                                                                                                                                                                                                                                                                                                                                                                                                                                                                                                                                                                                                                                                                                                                                                                                                                                                                                                                                                                                                                                                                                                                                                                                                                                                                                |
| Complete List of Authors:       | Mamadjanov, Temur; Ludwig-Maximilians-Universitat Munchen, Institute for Medical Information Processing, Biometry and Epidemiology – IBE; Ludwig-Maximilians-Universitat Munchen, UNIKA-T Augsburg<br>Volaklis, Konstantinos; Ludwig-Maximilians-Universitat Munchen, Chair of Epidemiology, UNIKA-T Augsburg<br>Heier , Margit; Helmholtz Zentrum Munchen Deutsches Forschungszentrum fur Gesundheit und Umwelt, Epidemiology; Universitätsklinikum Augsburg, KORA Study Centre<br>Freuer, Dennis; Ludwig-Maximilians-Universitat Munchen, Chair of Epidemiology, UNIKA-T Augsburg<br>Amann, Ute ; Helmholtz Zentrum Munchen Deutsches Forschungszentrum fur Gesundheit und Umwelt, Independent Research Group Clinical Epidemiology<br>Peters, Annette; Helmholtz Zentrum Munchen Deutsches Forschungszentrum fur Gesundheit und Umwelt, Epidemiology<br>Kuch, B; Hospital of Nördlingen, Department of Internal Medicine/Cardiology<br>Thilo, Christian; University Hospital Augsburg, Department of Cardiology, Respiratory Medicine and Intensive Care<br>Linseisen, Jakob; Ludwig-Maximilians-Universitat Munchen, Chair of Epidemiology at UNIKA-T; Helmholtz Zentrum Munchen Deutsches Forschungszentrum fur Umwelt und Gesundheit, Independent Research Group Clinical Epidemiology<br>Meisinger, Christa; Ludwig-Maximilians-Universitat Munchen, Chair of Epidemiology, UNIKA-T |
| <b>Primary Subject Heading</b>: | Epidemiology                                                                                                                                                                                                                                                                                                                                                                                                                                                                                                                                                                                                                                                                                                                                                                                                                                                                                                                                                                                                                                                                                                                                                                                                                                                                                                                                                                               |
| Secondary Subject Heading:      | Cardiovascular medicine                                                                                                                                                                                                                                                                                                                                                                                                                                                                                                                                                                                                                                                                                                                                                                                                                                                                                                                                                                                                                                                                                                                                                                                                                                                                                                                                                                    |
| Keywords:                       | Cardiac Epidemiology < CARDIOLOGY, Myocardial infarction < CARDIOLOGY, EPIDEMIOLOGY                                                                                                                                                                                                                                                                                                                                                                                                                                                                                                                                                                                                                                                                                                                                                                                                                                                                                                                                                                                                                                                                                                                                                                                                                                                                                                        |
|                                 |                                                                                                                                                                                                                                                                                                                                                                                                                                                                                                                                                                                                                                                                                                                                                                                                                                                                                                                                                                                                                                                                                                                                                                                                                                                                                                                                                                                            |

1  
2  
3  
4  
5  
6  
7  
8  
9  
10  
11  
12  
13  
14  
15  
16  
17  
18  
19  
20  
21  
22  
23  
24  
25  
26  
27  
28  
29  
30  
31  
32  
33  
34  
35  
36  
37  
38  
39  
40  
41  
42  
43  
44  
45  
46  
47  
48  
49  
50  
51  
52  
53  
54  
55  
56  
57  
58  
59  
60

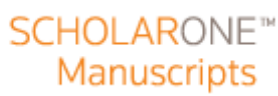



I, the Submitting Author has the right to grant and does grant on behalf of all authors of the Work (as defined in the below author licence), an exclusive licence and/or a non-exclusive licence for contributions from authors who are: i) UK Crown employees; ii) where BMJ has agreed a CC-BY licence shall apply, and/or iii) in accordance with the terms applicable for US Federal Government officers or employees acting as part of their official duties; on a worldwide, perpetual, irrevocable, royalty-free basis to BMJ Publishing Group Ltd ("BMJ") its licensees and where the relevant Journal is co-owned by BMJ to the co-owners of the Journal, to publish the Work in this journal and any other BMJ products and to exploit all rights, as set out in our [licence](#).

The Submitting Author accepts and understands that any supply made under these terms is made by BMJ to the Submitting Author unless you are acting as an employee on behalf of your employer or a postgraduate student of an affiliated institution which is paying any applicable article publishing charge ("APC") for Open Access articles. Where the Submitting Author wishes to make the Work available on an Open Access basis (and intends to pay the relevant APC), the terms of reuse of such Open Access shall be governed by a Creative Commons licence – details of these licences and which [Creative Commons](#) licence will apply to this Work are set out in our licence referred to above.

Other than as permitted in any relevant BMJ Author's Self Archiving Policies, I confirm this Work has not been accepted for publication elsewhere, is not being considered for publication elsewhere and does not duplicate material already published. I confirm all authors consent to publication of this Work and authorise the granting of this licence.

1  
2  
3 **Admission glucose level and short-term mortality in older patients with acute myocardial**  
4 **infarction: results from the KORA myocardial infarction registry**  
5

6 Mamadjanov T<sup>1,2,3\*</sup>, Volaklis K<sup>3\*</sup>, Heier M<sup>4,8</sup>, Freuer D<sup>3</sup>, Amann U<sup>5</sup>, Peters A<sup>4</sup>, Kuch B<sup>6</sup>, Thilo  
7 C<sup>7</sup>, Linseisen J<sup>3,5</sup>, Meisinger C<sup>3,5</sup>  
8  
9

10  
11  
12 <sup>1</sup> Institute for Medical Information Processing, Biometry and Epidemiology – IBE, LMU  
13 Munich, Germany  
14

15 <sup>2</sup> Pettenkofer School of Public Health Munich, Germany  
16

17 <sup>3</sup> Ludwig-Maximilians-Universität München, Chair of Epidemiology, UNIKA-T Augsburg,  
18 Neusässer Str. 47, 86156 Augsburg, Germany  
19

20 <sup>4</sup> KORA study centre, University Hospital of Augsburg, Augsburg, Germany  
21

22 <sup>5</sup> Helmholtz Zentrum München, Independent Research Group Clinical Epidemiology,  
23 Ingolstädter Landstr. 1, 85764 Neuherberg, Germany  
24

25 <sup>6</sup> Hospital of Nördlingen, Department of Internal Medicine/Cardiology, Nördlingen, Germany  
26

27 <sup>7</sup> University Hospital of Augsburg, Department of Cardiology, Respiratory Medicine and  
28 Intensive Care, Stenglinstr. 2, 86156 Augsburg, Germany  
29

30 <sup>8</sup> Universitätsklinikum Augsburg, KORA Study Centre, Augsburg, Germany  
31  
32

---

33 \* shared first authorship  
34

35 Correspondence to Temur Mamadjanov (temurmamadjanov@gmail.com)  
36  
37  
38  
39  
40  
41  
42  
43  
44  
45  
46  
47  
48  
49  
50  
51  
52  
53  
54  
55  
56  
57  
58  
59  
60

## Abstract

### **Study objectives:**

To investigate the association between admission blood glucose levels and 28-day mortality as well as in-hospital complications in older patients with incident acute myocardial infarction (AMI) undergoing modern treatment.

### **Methods:**

From a German population-based regional myocardial infarction registry, 5530 patients (2016 females), aged 65-84 years, hospitalized with an incident AMI between January 1, 2009 and December 31, 2016 were included in the study. Multivariable logistic regression models were used to assess the associations between admission blood glucose and 28-day-mortality as well as in-hospital complications after AMI. Analyses stratified according to age, diabetes, and type of infarction (ST-elevation MI/non-ST-elevation MI) were conducted.

### **Results:**

The adjusted odds ratios (OR) for the association between admission blood glucose and 28-day-mortality in young-old (65-74) and old (75-85) AMI patients were 1.40 (95% CI: 1.21-1.62) and OR 1.21 (95% CI: 0.98-1.50) per 1 SD increase in admission blood glucose, respectively. Furthermore, higher admission blood glucose was related to case-fatality irrespective of the diabetes status and type of infarction only in the under-75 group. For the patients aged 75-84 years it was only true for those without diabetes and STEMI infarctions. Admission blood glucose was also associated with major cardiac complications in both age-groups.

### **Conclusion:**

Admission blood glucose was significantly associated with 28-day case fatality in AMI patients aged 65-74 years but not 75-84 years; furthermore, in both age-groups there was an increased risk of major complications. It seems that admission glucose may play a rather minor role in terms of case-fatality in higher-aged AMI patients.

**Keywords:** myocardial infarction, admission blood glucose, mortality, elderly

### ***Strengths and limitations***

This study was observational and was limited to 65-84 years old German patients with incident AMI.

The analysis was limited to admission blood glucose values only and it cannot be ruled out that some hyperglycemic patients without a history of diabetes are true diabetes cases who have not been diagnosed before.

Multivariable analysis was adjusted for several risk factors, residual confounding cannot be entirely excluded.

Data was collected within the framework of the population-based MI registry.

Important risk factors such as comorbidities, in-hospital treatment and complications were included in the analysis.

## Introduction

Elevated admission blood glucose levels are common in patients hospitalized for acute myocardial infarction (AMI); the prevalence of admission hyperglycemia in epidemiological studies for these patients ranges from 40% to > 58% (1, 2). Several studies and meta-analyses further suggested that hyperglycemia upon admission is an independent risk factor for adverse outcomes and mortality among patients hospitalized with AMI (3, 4).

Timmer et al. (5-9) demonstrated that higher glucose level on admission is independently associated with increased sensitivity to ischemia-reperfusion injury such as impaired initial flow in the infarct-related artery. Blood glucose level was also described as an independent prognostic factor for impaired microvascular function, or the no-reflow phenomenon (10). In addition, some studies showed that patients with hyperglycemia have a higher Killip class and thus mortality risk (11). Moreover, a larger infarct size and worse left ventricular function were linked to a higher glucose level (12), and an addition of blood glucose levels improves the predictive ability of the Global Registry of Acute Coronary Events (GRACE) risk score (13, 14).

The majority of the existing studies were conducted in the pre-reperfusion era (3, 15-17), were focused on patients with or without diabetes (18, 19) or included the whole spectrum of acute coronary syndromes in their analysis (20). So far, only a few studies examined the association between admission blood glucose levels and short-term outcomes (including in-hospital mortality and cardiac complications) in older people (21). Furthermore, the association between admission glucose in certain subgroups of older AMI patients are missing so far. Therefore, the aim of this study including all non-selected hospitalized cases with incident AMI was to investigate the association of admission glucose on 28-day case fatality and cardiac complications in 65 to 84 years old patients undergoing non-invasive and invasive therapy. Analyses stratified according to diabetes, age, and type of infarction were conducted to determine the importance of admission blood glucose for the short-term prognosis of certain AMI patient subgroups.

## Methods

### *Study design and data source*

Data for the present observational study came from the population-based KORA (Cooperative Health Research in the Region of Augsburg) Myocardial Infarction Registry (Bavaria, Germany), which was implemented in October 1984 as part of the WHO MONICA (Monitoring Trends and Determinants in Cardiovascular Disease) project. Since then all cases of fatal and non-fatal acute myocardial infarction (AMI) occurring among the 25 to 74 years old residents of the study area (city of Augsburg and two adjacent counties), who were admitted to one out of 8 hospitals in the study area have been continuously registered. The registry was included into the KORA framework when the MONICA project was terminated in 1995. Detailed information on methods of case identification, diagnostic classification of events, and quality control of the data have been described in previous publications (22-24). Diagnostic criteria for AMI case identification were adapted to the joint statement of the European Society of Cardiology and American College of Cardiology and applied since 2001 (25). From 2009 onwards, the registry was extended for the elderly up to 84 years.

### *Data collection and measurements*

Patients with AMI, who have survived for at least 24 hours after hospitalization were interviewed by specially trained nurses using a standardized questionnaire. Information on sociodemographic data, acute symptoms, cardiovascular risk factors, and history of several diseases was collected. Diabetes status (yes/no) was based on what was known on admission only. Data on AMI characteristics, drug treatment before and during hospital stay, medication use at discharge, in-hospital adverse events, including ventricular fibrillation, cardiogenic shock, cardiac arrest, recurrent myocardial infarction, and pulmonary edema were provided by chart review. Additionally, laboratory parameters including the first blood glucose level at admission (referred as admission glucose level), ECG data, and the process of care in hospital were also determined. The kind of reperfusion therapy (thrombolysis, percutaneous coronary intervention, and coronary artery bypass grafting) was documented. The study has been approved by the ethics committee of the Bavarian Medical Association (Bayerische Landesärztekammer) and the study was performed in accordance with the Declaration of Helsinki. All study participants gave written informed consent.



### *Study population*

Between January 1, 2009 and December 31, 2016, a total of 7681 patients aged 65 to 84 years were admitted to one of the hospitals in the study region due to an AMI. Of those, 1803 patients had a re-infarction and 9 patients had missing information on infarction history and were therefore excluded. Furthermore, we excluded 255 patients without data on admission glucose level and 84 patients with missing covariates information. This resulted in a total of 5530 patients (3514 men, 2016 women) with incident AMI for analysis.

### *Patient and public involvement*

Patients and public were not involved in the research process.

### *Outcomes*

The primary endpoint of the study was case fatality within 28 days. A multiple logistic regression model was used to assess the association between the first admission glucose level and 28-day case fatality (yes/no). The secondary endpoint was a combined endpoint of in-hospital complications including cardiac arrest, recurrent infarction, pulmonary edema, cardiogenic shock, ventricular tachycardia, ventricular bradycardia and ventricular fibrillation.

### *Statistical analysis*

Continuous data were expressed as mean values and standard deviation (SD) as well as median and interquartile range (25th and 75th quintile) in case of non-normal distribution. Categorical data were described with absolute values and percentages. Chi-square test was used to test differences in prevalences. The two-sided Welch's t-test was used to compare means.

Due to the large number of missing values presented in Table 1, we used multiple imputation before regression. Since the missing mechanism was not completely at random, this approach minimized bias of the effect estimates and increased statistical power. Multivariable analyses were performed for the whole sample and also stratified by age-groups (65-74/75-85 years), diabetes status (yes/no), and type of infarction (STEMI/NSTEMI) using forward stepwise logistic regression to identify variables independently associated with 28-day case fatality (yes/no) after AMI. The variables age (only in the analysis including the total sample) and sex were forced into each model during the variable selection procedure. The significance

1  
2  
3 criterion for staying in the final model was chosen as  $p < 0.05$ . The association between  
4 admission blood glucose level and the primary endpoint was adjusted for sex and age in the  
5 first model. The second model included previous factors and any reperfusion therapy (yes/no),  
6 treatment with angiotensin-converting enzyme (ACE) inhibitor (yes/no), beta-blocker  
7 (yes/no), lipid-lowering drug (yes/no), antiplatelets during hospital stay (yes/no), insulin  
8 (yes/no), cardiac arrest during hospitalization (yes/no), any other complication during hospital  
9 stay (recurrent infarction, ventricular fibrillation, ventricular tachycardia, bradycardia,  
10 pulmonary edema and cardiogenic shock), and diabetes (yes/no).  
11  
12

13  
14  
15  
16  
17  
18 In logistic regression analysis investigating the association between admission blood glucose  
19 level and the secondary endpoint, the first model included admission blood glucose, age and  
20 sex. The second model was adjusted additionally for diabetes (yes/no), any reperfusion  
21 therapy (yes/no), treatment with angiotensin-converting enzyme (ACE) inhibitor (yes/no),  
22 beta-blocker (yes/no), lipid-lowering drug (yes/no), antiplatelets during hospital stay (yes/no),  
23 and insulin (yes/no). Odds ratios and 95% CI interval were computed per 1 SD increase of  
24 admission blood glucose level.  
25  
26  
27  
28  
29  
30  
31

32 We conducted a formal test to identify an interaction with sex, age, diabetes and myocardial  
33 infarction type. The test showed significant interaction with age and diabetes. Due to a  
34 significant interaction with age, the sample was stratified into two age groups: “young old”  
35 patients (65-74 years) and “old” patients (75-85 years) (Figure 1). In addition, stratified  
36 analyses were conducted for patients with and without diabetes, and for STEMI/NSTEMI  
37 patients.  
38  
39  
40  
41  
42

43 We used restricted cubic splines with different numbers of knots for testing the linearity  
44 assumption of the appropriate multivariable logistic model. For all investigations, a  
45 significance level of 5% was applied. Analyses were performed using R version 3.5.2.  
46  
47  
48  
49  
50  
51  
52  
53  
54  
55  
56  
57  
58  
59  
60

## Results

In total, the study sample consisted of 5530 women and men aged 65-84 years. There were 292 (7.9%) deaths within 28 days among 3709 patients aged 65-74 years and 209 (11.5%) deaths among 1821 patients aged 75-84 years. The median admission glucose level was 94.0 mg/dl (interquartile range 68.0 to 138.0 mg/dl) and 37.9% of the patients in the total sample had known diabetes.

The baseline characteristics of the patients according to the age groups are shown in Table 1. The older age group was associated with a higher proportion of female patients and a higher frequency of patients with a history of hypertension. In the younger age group a higher prevalence of ST-elevation myocardial infarction type as well as non-ST-elevation myocardial infarction type than in the older age group was observed. Patients in the younger age group showed a higher prevalence of lipid disorders in comparison to the older age group.

Treatment during hospital stay according to the age groups is shown in Table 2. More young old patients less likely received ACE inhibitors, beta-blockers and nitrates. On the other hand, older patients were more often treated with calcium channel blockers and angiotensin II antagonists. There was no difference in treatment with lipid lowering drugs, antiplatelets and insulin. At least one recanalization therapy (PCI, CABG or thrombolysis) was more likely performed in the younger old compared to the older patients.

Major complications in AMI patients occurring during hospital stay are listed in Table 3. Frequency of in-hospital cardiac arrest was significantly higher in the older patients' group. Regarding other in-hospital complications including cardiogenic shock, pulmonary edema, ventricular fibrillation, tachycardia and re-infarction there was no significant difference between the two age groups.

In the whole sample, as it is presented in Table 4, admission blood glucose was significantly associated with 28-day case fatality: per 1 SD increase in admission blood glucose level the OR for 28-day mortality was 1.33 (95% CI: 1.19-1.50). In the younger old group there was also a significant relationship; per 1 SD increase of blood glucose the OR for 28-day case fatality was 1.40 (95% CI: 1.21-1.62). Among the older patients, there was no significant association in the fully adjusted model (OR 1.21; 95% CI: 0.98-1.50).

1  
2  
3 In addition, blood glucose levels at admission were independently associated with major in-  
4 hospital complications in the total sample and in both age groups (Table 4). Among all patients  
5 the OR for any major complication was 1.25 (95% CI: 1.17-1.35) per 1 SD increase of blood  
6 glucose level; among the patients aged 65-74 years and 75-84 years the OR was 1.24 (95% CI:  
7 1.13-1.35) and 1.29 (95% CI: 1.14-1.47) per 1 SD increase of blood glucose level, respectively.  
8  
9

10  
11  
12 Admission glucose level was significantly associated with higher 28-day mortality and hospital  
13 complications, irrespective of diabetes status in both the younger old and old group (except  
14 the association with the 28-day mortality in the older group) (Table 4). In patients with STEMI  
15 but not with NSTEMI a significant association with 28-day case-fatality could be observed for  
16 both, young old and old patients. Regarding in-hospital complications, in STEMI patients a  
17 significant relationship could be found for the older patients (OR 1.68; 95% CI: 1.24-2.27). In  
18 NSTEMI patients a significant association with in-hospital complications could be shown for  
19 both the younger old (OR 1.17; 95% CI 1.04-1.33) and old group (OR 1.20; 95% CI 1.01-1.43).  
20  
21  
22  
23  
24  
25  
26  
27  
28  
29  
30  
31  
32  
33  
34  
35  
36  
37  
38  
39  
40  
41  
42  
43  
44  
45  
46  
47  
48  
49  
50  
51  
52  
53  
54  
55  
56  
57  
58  
59  
60

## Discussion

In this real-world study including all consecutive hospitalized, unselected cases with incident AMI in patients 65 to 84 years of age, 28-day case fatality was associated with increasing blood glucose concentrations measured at hospital admission. The risk of death in the younger old patients (65-74 years) increased significantly with increasing blood glucose levels, but in the older patients' group (75-84 years) no independent association was found. In addition, admission glucose was significantly associated with a higher 28-day mortality in the total sample of patients with and without diabetes, and in STEMI patients. The risk of major in-hospital complications after incident AMI was also related to higher admission blood glucose levels in both age groups, in the total sample of patients with and without diabetes, STEMI and NSTEMI patients.

Previous studies have demonstrated that elevated blood glucose on admission is common in patients with AMI and is independently associated with a higher risk of in-hospital mortality and in-hospital complications, such as cardiac arrest, cardiogenic shock, and pulmonary edema regardless of diabetes status (26-28). Although numerous studies have documented this association (21, 29-31), the impact of admission blood glucose on short-term mortality and in-hospital complications in older patients with AMI remains underappreciated so far.

In a large population-based study including AMI patients aged 65 years and older (21), glucose levels were associated with 30-day case fatality in patients without known diabetes (referent: glucose  $\leq$  110 mg/dl; range from glucose  $>$ 110 to 140 mg/dl: HR 1.17; 95% CI: 1.11-1.24; to glucose  $>$ 240 mg/dl: HR 1.87; 95% CI: 1.75-2.00). In a nationally representative study of patients (median age 67 years) hospitalized with AMI in China, Zhao et al. (31) reported that both moderate and severe hyperglycemia (blood glucose  $\geq$  11.1 mmol/L) on admission were associated with an elevated risk for in-hospital mortality among both patients without and with diabetes. Fujino et al. (30) analyzed the short-term outcome of acute hyperglycemia on admission ( $\geq$  200 mg/dL) and chronic hyperglycemia defined by an HbA1C  $\geq$  6.5% in a small sample of acute AMI patients and reported that acute hyperglycemia but not chronic hyperglycemia was an independent predictor of in-hospital mortality.

Several prior studies examined the association between hyperglycemia on admission and complications of AMI. Dziewierz et al. (26) analyzed data of elderly AMI patients of the

1  
2  
3 Poland's Krakow Registry and found that hyperglycemia on admission was related to an  
4 increased risk of pulmonary edema and heart rhythm/conduction disturbances in both  
5 patients with and without diabetes. In another study Kim et al. (28) found a significant  
6 association between hyperglycemia and life-threatening complications during hospitalization  
7 such as cardiogenic shock, decreased hemoglobin level (hemoglobin  $\geq$  5g/dL), atrioventricular  
8 block, ventricular tachycardia, and atrial fibrillation. Besides, they observed that a higher age  
9 of patients ( $\geq$  75 years), female sex, STEMI, low LV function, low revascularization ratio, larger  
10 infarct size and inflammation were related to hyperglycemia on admission.  
11  
12  
13  
14  
15  
16  
17

18 The results of the present study confirm the findings regarding a strong association between  
19 admission blood glucose and short-term mortality as well as in-hospital complications in AMI  
20 patients independent of diabetes status. Contrary to our study, prior studies did not evaluate  
21 how the relationship between admission glucose and outcomes varies between different age  
22 groups or other AMI subgroups in higher aged patients. The present study therefore expands  
23 the current understanding of the relevance of admission glucose regarding adverse outcomes  
24 in subgroups of older AMI patients. Further studies on this issue are necessary to confirm or  
25 refute our findings.  
26  
27  
28  
29  
30  
31  
32

33 The present data indicated that admission glucose had different impacts on adverse short-  
34 term outcomes in elderly STEMI versus NSTEMI patients. Prior studies investigating the  
35 relevance of admission glucose on outcomes were mostly conducted in STEMI patients (32-  
36 34) or included both STEMI and NSTEMI patients (21, 35, 36); only a few studies were  
37 conducted in NSTEMI-samples (37). In addition, studies on this issue conducted in elderly AMI  
38 patients are scarce (38). For example, a meta-analysis including six cohort studies reported  
39 that elevated admission glucose ( $\geq$ 6.1-11.1 mmol/L) was significantly associated with short-  
40 term mortality in STEMI patients without diabetes (RR 4.38; 95% CI 3.23-5.94) (39). In another  
41 study conducted in NSTEMI patients undergoing PCI, admission blood glucose was a predictor  
42 of 30-day major adverse cardiovascular events (MACE), irrespective of diabetes status (37).  
43 Our results suggested that admission glucose might be a predictor of short-term mortality and  
44 in-hospital complications in 65-84 year old STEMI patients, while in NSTEMI patients it was  
45 associated with in-hospital complications only.  
46  
47  
48  
49  
50  
51  
52  
53  
54  
55  
56

57 The increased mortality related to high admission glucose levels in AMI patients has been  
58 linked to different pathophysiologic mechanisms. There is evidence for the toxic effects of  
59  
60

1  
2  
3 hyperglycemia on cell function, because acute high blood glucose might induce oxidative  
4 stress, most likely via generation of free radicals (2). Moreover, hyperglycemia inhibits  
5 metabolic processes in the myocardium and induces apoptosis in cardiomyocytes. Chang et  
6 al. (40) showed an association between high glucose level and sFas serum levels, which is a  
7 valuable biomarker of the physiological response to ischemia.  
8  
9

10  
11  
12  
13 Stress hyperglycemia in myocardial infarction patients could also be associated with adverse  
14 outcomes due to its ability to increase systemic inflammation and activation of stress  
15 responsive kinases. Recently, Marfella et al. (41) demonstrated an association between  
16 inflammatory markers and functional cardiac outcome in patients with an incident myocardial  
17 infarction. In that study hyperglycemia was associated with amplified inflammatory immune  
18 reactions and worse functional cardiac outcome.  
19  
20  
21  
22

23  
24 Moreover, hyperglycemia is strongly associated with impaired coronary flow before  
25 reperfusion and has been related to enhanced thrombin formation, platelet activation, and  
26 fibrin clot resistance to lysis. Hyperglycemia has been linked to increased sensitivity to  
27 ischemia-reperfusion injury (9, 42). These pathological processes may vary with age, that  
28 could explain, at least in part, our results.  
29  
30  
31  
32  
33

34  
35 It is well known that age is a risk factor for cardiovascular disease and an independent risk  
36 factor for mortality and adverse outcomes after AMI. For example, Shechter et al. (43)  
37 demonstrated that AMI patients over 80 years had more major adverse cardiac events  
38 (including re-infarction, post-infarction angina, ischemic stroke, high-degree atrioventricular  
39 block, acute renal failure, and major bleeding) in-hospital and a four- to five-fold higher  
40 mortality rate than younger patients. Furthermore, age is related to frequent complications  
41 and side effects of treatment interventions and pharmacotherapy (44). Additionally, the  
42 hemodynamic impact of a given infarct size may be more pronounced in the elderly as a result  
43 of reduced cardiac reserve (45). There is also a greater likelihood of comorbid illnesses with  
44 advancing age, which contribute to poorer outcomes (46). The non-significant association  
45 between admission glucose levels and 28-day mortality in the age group 75-84 years in our  
46 study may be attributed to the fact, that these patients suffered more often from  
47 comorbidities and were more severely ill (e.g. higher complication rate, a higher proportion  
48 of patients with an LVEF <30%) compared to the younger age-group; it might be thinkable that  
49 admission glucose values might not have a major influence on the case-fatality in this group.  
50  
51  
52  
53  
54  
55  
56  
57  
58  
59  
60



### *Strengths and limitations*

Several important limitations of the present study should be acknowledged. First, our study was observational and non-randomized by nature and therefore, causality could not be evaluated. Second, the analysis was limited to admission blood glucose values. In patients without diabetes, admission blood glucose alone without HbA1c values to test for undiagnosed diabetes or prediabetes and without post-discharge tests to assess the glycaemic state after the drop of stress during hospital admission, the meaning and interpretation of admission hyperglycaemia in clinical practice is difficult (47-50). We cannot exclude the possibility that the outcome in the group without diabetes was driven by prediabetes or undiagnosed diabetes. Furthermore, there is a lack of information on the effect of in hospital treatment regarding hyperglycemia and hypoglycemia, and how glucose levels during hospital stay affected adverse outcomes. Additionally, in our study, we did not assess major comorbidities, which can increase the risk of death (e.g. lung disease, chronic renal failure or peripheral vascular disease) and for this reason our results should be interpreted with caution. Although our multivariable analysis was adjusted for several risk factors, residual confounding cannot be entirely excluded. Finally, our study was limited to 65-84 years old German patients with incident AMI, therefore it remains uncertain if our results apply to other populations and age subgroups of patients.

The present study is characterized by several strengths. Data was collected within the framework of a population-based MI registry, and the consecutively admitted patients included from the general population presenting with first AMIs were registered according to a standardized protocol. Furthermore, important risk factors such as in-hospital treatment, complications and types of infarction were included in our analysis.

### *Conclusions*

Admission blood glucose was significantly associated with 28-day case fatality in AMI patients aged 65-74 years but not 75-84 years; furthermore, in both age-groups there was an increased risk of major complications. After stratification for diabetes and type of infarction admission blood glucose was significantly related to case-fatality irrespective of the diabetes status and type of infarction only in the patients aged 65-74 years. Thus, it is likely that admission glucose



1  
2  
3 plays only a minor role in terms of case-fatality in higher-aged AMI patients. The older the  
4  
5 patients are the more comorbidities they may have and the sicker these patients may be when  
6  
7 admitted to hospital. The probability that these patients die from these conditions seems to  
8  
9 be higher than that they die as a result of increased admission glucose.  
10  
11  
12  
13  
14  
15  
16  
17  
18  
19  
20  
21  
22  
23  
24  
25  
26  
27  
28  
29  
30  
31  
32  
33  
34  
35  
36  
37  
38  
39  
40  
41  
42  
43  
44  
45  
46  
47  
48  
49  
50  
51  
52  
53  
54  
55  
56  
57  
58  
59  
60

For peer review only

## Acknowledgments

The KORA study was initiated and financed by the Helmholtz Zentrum München – German Research Center for Environmental Health, which is funded by the German Federal Ministry of Education and Research (BMBF) and by the State of Bavaria.

### **Additionally for publications with genetic data or other omics data levels:**

Furthermore, KORA research was supported within the Munich Center of Health Sciences (MC-Health), Ludwig-Maximilians-Universität, as part of LMUinnovativ.

**Additionally for publications with data from KORA-Age:** The KORA-Age project was financed by the German Federal Ministry of Education and Research (BMBF FKZ 01ET0713 and 01ET1003A) as part of the 'Health in old age' program.

**Financial support:** The KORA research platform (Cooperative Research in the Region of Augsburg) was initiated and financed by the Helmholtz Zentrum München - German Research Center for Environmental Health, which is funded by the German Federal Ministry of Education and Research and by the State of Bavaria. Since 2000, the acquisition of data in acute myocardial infarction patients is co-financed by the German Federal Ministry of Health and Social Security to provide population-based myocardial infarction morbidity and mortality data for the official German Health Report (see [www.gbe-bund.de](http://www.gbe-bund.de)).

**Funding:** this research was a master's thesis of Temur Mamadjanov and was not supported by a grant.

**Competing interests:** None to declare.

**Contributors:** MT, VK, MC conceived the study. DF, MT, VK performed the statistical analysis and interpreted the results with feedback from MC, LJ, UA, KB, HM, PA, CT. MT, VK drafted and revised the manuscript based on comments, which were provided by all authors. MC, HM, KB, PA and CT contributed to data acquisition. All authors revised the manuscript critically for important intellectual content and approved the final version.

**Data availability statement:** Project agreements to use and access KORA data can be requested from national and international researchers via the KORA-PASST tool under <https://epi.helmholtz-muenchen.de/>

1  
2  
3 **Ethic statement**  
4

5 **Ethics approval:** The study has been approved by the ethics committee of the Bavarian  
6 Medical Association (Ethik-Kommission Nr. 08064) and the study was performed in  
7 accordance with the Declaration of Helsinki. All study participants gave written informed  
8 consent.  
9  
10  
11  
12

13 **Patients consent for publication:** Not required  
14

15 **Clinical trial name:** No trial name/ URL/ registration number assigned (observational study  
16 from a population- based registry)  
17  
18  
19  
20  
21  
22  
23  
24  
25  
26  
27  
28  
29  
30  
31  
32  
33  
34  
35  
36  
37  
38  
39  
40  
41  
42  
43  
44  
45  
46  
47  
48  
49  
50  
51  
52  
53  
54  
55  
56  
57  
58  
59  
60

## References

1. Goyal A, Mehta SR, Gerstein HC, Diaz R, Afzal R, Xavier D, et al. Glucose levels compared with diabetes history in the risk assessment of patients with acute myocardial infarction. *Am Heart J*. 2009;157(4):763-70.
2. Kosiborod M, Inzucchi SE, Krumholz HM, Xiao L, Jones PG, Fiske S, et al. Glucometrics in patients hospitalized with acute myocardial infarction: defining the optimal outcomes-based measure of risk. *Circulation*. 2008;117(8):1018-27.
3. Capes SE, Hunt D, Malmberg K, Gerstein HC. Stress hyperglycaemia and increased risk of death after myocardial infarction in patients with and without diabetes: a systematic overview. *Lancet*. 2000;355(9206):773-8.
4. Goyal A, Mahaffey KW, Garg J, Nicolau JC, Hochman JS, Weaver WD, et al. Prognostic significance of the change in glucose level in the first 24 h after acute myocardial infarction: results from the CARDINAL study. *Eur Heart J*. 2006;27(11):1289-97.
5. Timmer JR, Ottervanger JP, de Boer MJ, Dambrink JH, Hoorntje JC, Gosselink AT, et al. Hyperglycemia is an important predictor of impaired coronary flow before reperfusion therapy in ST-segment elevation myocardial infarction. *J Am Coll Cardiol*. 2005;45(7):999-1002.
6. Timmer JR, Hoekstra M, Nijsten MW, van der Horst IC, Ottervanger JP, Slingerland RJ, et al. Prognostic value of admission glycosylated hemoglobin and glucose in nondiabetic patients with ST-segment-elevation myocardial infarction treated with percutaneous coronary intervention. *Circulation*. 2011;124(6):704-11.
7. Timmer JR, van der Horst IC, Ottervanger JP, Henriques JP, Hoorntje JC, de Boer MJ, et al. Prognostic value of admission glucose in non-diabetic patients with myocardial infarction. *Am Heart J*. 2004;148(3):399-404.
8. Norhammar AM, Ryden L, Malmberg K. Admission plasma glucose. Independent risk factor for long-term prognosis after myocardial infarction even in nondiabetic patients. *Diabetes Care*. 1999;22(11):1827-31.
9. R.J. T. Hyperglycemia Is an Important Predictor of Impaired Coronary Flow Before Reperfusion Therapy in ST-Segment Elevation Myocardial Infarction. *Journal of the American College of Cardiology*. 2005;45(7):999-1002.
10. Iwakura K, Ito H, Ikushima M, Kawano S, Okamura A, Asano K, et al. Association between hyperglycemia and the no-reflow phenomenon in patients with acute myocardial infarction. *J Am Coll Cardiol*. 2003;41(1):1-7.
11. Cheng HH, Yen PC. Killip classification and glucose level in patients with acute myocardial infarction. *Am J Emerg Med*. 2010;28(8):853-6.
12. Hsu CW, Chen HH, Sheu WH, Chu SJ, Shen YS, Wu CP, et al. Initial serum glucose level as a prognostic factor in the first acute myocardial infarction. *Ann Emerg Med*. 2007;49(5):618-26.
13. Luis C.L. Correia MSR, Ana P. Bittencourt, Rafael Freitas, Alexandre C. Souza, Maria C. Almeida, J. Péricles Esteves. Does acute hyperglycemia add prognostic value to the GRACE score in individuals with non-ST elevation acute coronary syndromes? *Clinica Chimica Acta*. 2009;410,(1-2):74-8.
14. Timoteo AT, Papoila AL, Rio P, Miranda F, Ferreira ML, Ferreira RC. Prognostic impact of admission blood glucose for all-cause mortality in patients with acute coronary syndromes: added value on top of GRACE risk score. *Eur Heart J Acute Cardiovasc Care*. 2014;3(3):257-63.
15. Bellodi G, Manicardi V, Malavasi V, Veneri L, Bernini G, Bossini P, et al. Hyperglycemia and prognosis of acute myocardial infarction in patients without diabetes mellitus. *Am J Cardiol*. 1989;64(14):885-8.
16. O'Sullivan JJ, Conroy RM, Robinson K, Hickey N, Mulcahy R. In-hospital prognosis of patients with fasting hyperglycemia after first myocardial infarction. *Diabetes Care*. 1991;14(8):758-60.
17. Oswald GA, Smith CC, Betteridge DJ, Yudkin JS. Determinants and importance of stress hyperglycaemia in non-diabetic patients with myocardial infarction. *Br Med J (Clin Res Ed)*. 1986;293(6552):917-22.

18. Hadjadj S, Coisne D, Mauco G, Ragot S, Duengler F, Sosner P, et al. Prognostic value of admission plasma glucose and HbA in acute myocardial infarction. *Diabet Med*. 2004;21(4):305-10.
19. Sala J, Masia R, Gonzalez de Molina FJ, Fernandez-Real JM, Gil M, Bosch D, et al. Short-term mortality of myocardial infarction patients with diabetes or hyperglycaemia during admission. *J Epidemiol Community Health*. 2002;56(9):707-12.
20. Foo K, Cooper J, Deaner A, Knight C, Suliman A, Ranjadayalan K, et al. A single serum glucose measurement predicts adverse outcomes across the whole range of acute coronary syndromes. *Heart*. 2003;89(5):512-6.
21. Kosiborod M, Rathore SS, Inzucchi SE, Masoudi FA, Wang Y, Havranek EP, et al. Admission glucose and mortality in elderly patients hospitalized with acute myocardial infarction: implications for patients with and without recognized diabetes. *Circulation*. 2005;111(23):3078-86.
22. Kuch B, Heier M, von Scheidt W, Kling B, Hoermann A, Meisinger C. 20-year trends in clinical characteristics, therapy and short-term prognosis in acute myocardial infarction according to presenting electrocardiogram: the MONICA/KORA AMI Registry (1985-2004). *J Intern Med*. 2008;264(3):254-64.
23. Lowel H, Meisinger C, Heier M, Hormann A. The population-based acute myocardial infarction (AMI) registry of the MONICA/KORA study region of Augsburg. *Gesundheitswesen*. 2005;67 Suppl 1:S31-7.
24. Meisinger C, Hormann A, Heier M, Kuch B, Lowel H. Admission blood glucose and adverse outcomes in non-diabetic patients with myocardial infarction in the reperfusion era. *Int J Cardiol*. 2006;113(2):229-35.
25. Alpert JS, Thygesen K, Antman E, Bassand JP. Myocardial infarction redefined--a consensus document of The Joint European Society of Cardiology/American College of Cardiology Committee for the redefinition of myocardial infarction. *J Am Coll Cardiol*. 2000;36(3):959-69.
26. Dziewierz A, Giszterowicz D, Siudak Z, Rakowski T, Dubiel JS, Dudek D. Admission glucose level and in-hospital outcomes in diabetic and non-diabetic patients with acute myocardial infarction. *Clin Res Cardiol*. 2010;99(11):715-21.
27. Ishihara M. Acute hyperglycemia in patients with acute myocardial infarction. *Circ J*. 2012;76(3):563-71.
28. Kim EJ, Jeong MH, Kim JH, Ahn TH, Seung KB, Oh DJ, et al. Clinical impact of admission hyperglycemia on in-hospital mortality in acute myocardial infarction patients. *Int J Cardiol*. 2017;236:9-15.
29. Ding XS, Wu SS, Chen H, Zhao XQ, Li HW. High admission glucose levels predict worse short-term clinical outcome in non-diabetic patients with acute myocardial infarction: a retrospective observational study. *BMC Cardiovasc Disord*. 2019;19(1):163.
30. Fujino M, Ishihara M, Honda S, Kawakami S, Yamane T, Nagai T, et al. Impact of acute and chronic hyperglycemia on in-hospital outcomes of patients with acute myocardial infarction. *Am J Cardiol*. 2014;114(12):1789-93.
31. Zhao S, Murugiah K, Li N, Li X, Xu ZH, Li J, et al. Admission Glucose and In-hospital Mortality after Acute Myocardial Infarction in Patients with or without Diabetes: A Cross-sectional Study. *Chin Med J (Engl)*. 2017;130(7):767-75.
32. Li DB, Hua Q, Guo J, Li HW, Chen H, Zhao SM. Admission glucose level and in-hospital outcomes in diabetic and non-diabetic patients with ST-elevation acute myocardial infarction. *Intern Med*. 2011;50(21):2471-5.
33. Chen PC, Chua SK, Hung HF, Huang CY, Lin CM, Lai SM, et al. Admission hyperglycemia predicts poorer short- and long-term outcomes after primary percutaneous coronary intervention for ST-elevation myocardial infarction. *J Diabetes Investig*. 2014;5(1):80-6.
34. Pinto DS, Kirtane AJ, Pride YB, Murphy SA, Sabatine MS, Cannon CP, et al. Association of blood glucose with angiographic and clinical outcomes among patients with ST-segment elevation myocardial infarction (from the CLARITY-TIMI-28 study). *Am J Cardiol*. 2008;101(3):303-7.

- 1
  - 2
  - 3
  - 4
  - 5
  - 6
  - 7
  - 8
  - 9
  - 10
  - 11
  - 12
  - 13
  - 14
  - 15
  - 16
  - 17
  - 18
  - 19
  - 20
  - 21
  - 22
  - 23
  - 24
  - 25
  - 26
  - 27
  - 28
  - 29
  - 30
  - 31
  - 32
  - 33
  - 34
  - 35
  - 36
  - 37
  - 38
  - 39
  - 40
  - 41
  - 42
  - 43
  - 44
  - 45
  - 46
  - 47
  - 48
  - 49
  - 50
  - 51
  - 52
  - 53
  - 54
  - 55
  - 56
  - 57
  - 58
  - 59
  - 60
35. Norhammar A, Tenerz A, Nilsson G, Hamsten A, Efendic S, Ryden L, et al. Glucose metabolism in patients with acute myocardial infarction and no previous diagnosis of diabetes mellitus: a prospective study. *Lancet*. 2002;359(9324):2140-4.
36. Stranders I, Diamant M, van Gelder RE, Spruijt HJ, Twisk JW, Heine RJ, et al. Admission blood glucose level as risk indicator of death after myocardial infarction in patients with and without diabetes mellitus. *Arch Intern Med*. 2004;164(9):982-8.
37. Hao Y, Lu Q, Li T, Yang G, Hu P, Ma A. Admission hyperglycemia and adverse outcomes in diabetic and non-diabetic patients with non-ST-elevation myocardial infarction undergoing percutaneous coronary intervention. *BMC Cardiovasc Disord*. 2017;17(1):6.
38. Otten AM, Ottervanger JP, Timmer JR, van 't Hof AW, Dambrink JH, Gosselink AM, et al. Age-dependent differences in diabetes and acute hyperglycemia between men and women with ST-elevation myocardial infarction: a cohort study. *Diabetol Metab Syndr*. 2013;5(1):34.
39. Zhao CJ, Hao ZX, Liu R, Liu Y. Admission glucose and risk of early death in non-diabetic patients with ST-segment elevation myocardial infarction: a meta-analysis. *Med Sci Monit*. 2015;21:1387-94.
40. Chang J, Zhang G, Zhang L, Hou YP, Liu XL, Zhang L. High admission glucose levels increase Fas apoptosis and mortality in patients with acute ST-elevation myocardial infarction: a prospective cohort study. *Cardiovasc Diabetol*. 2013;12:171.
41. Marfella R, Siniscalchi M, Esposito K, Sellitto A, De Fanis U, Romano C, et al. Effects of stress hyperglycemia on acute myocardial infarction: role of inflammatory immune process in functional cardiac outcome. *Diabetes Care*. 2003;26(11):3129-35.
42. Undas A, Wiek I, Stepień E, Zmudka K, Tracz W. Hyperglycemia is associated with enhanced thrombin formation, platelet activation, and fibrin clot resistance to lysis in patients with acute coronary syndrome. *Diabetes Care*. 2008;31(8):1590-5.
43. Shechter M, Rubinstein R, Goldenberg I, Matetzki S, Acute Coronary Syndrome Israel S. Comparison of Outcomes of Acute Coronary Syndrome in Patients  $\geq 80$  Years Versus Those  $< 80$  Years in Israel from 2000 to 2013. *Am J Cardiol*. 2017;120(8):1230-7.
44. Stone PH, Thompson B, Anderson HV, Kronenberg MW, Gibson RS, Rogers WJ, et al. Influence of race, sex, and age on management of unstable angina and non-Q-wave myocardial infarction: The TIMI III registry. *JAMA*. 1996;275(14):1104-12.
45. De Carlo M, Morici N, Savonitto S, Grassia V, Sbarzaglia P, Tamburrini P, et al. Sex-Related Outcomes in Elderly Patients Presenting With Non-ST-Segment Elevation Acute Coronary Syndrome: Insights From the Italian Elderly ACS Study. *JACC Cardiovasc Interv*. 2015;8(6):791-6.
46. Gudnadottir GS, James SK, Andersen K, Lagerqvist B, Thrainsdottir IS, Ravn-Fischer A, et al. Outcomes after STEMI in old multimorbid patients with complex health needs and the effect of invasive management. *Am Heart J*. 2019;211:11-21.
47. Clement S, Braithwaite SS, Magee MF, Ahmann A, Smith EP, Schafer RG, et al. Management of diabetes and hyperglycemia in hospitals. *Diabetes Care*. 2004;27(2):553-91.
48. Handelsman Y, Bloomgarden ZT, Grunberger G, Umpierrez G, Zimmerman RS, Bailey TS, et al. American association of clinical endocrinologists and american college of endocrinology - clinical practice guidelines for developing a diabetes mellitus comprehensive care plan - 2015. *Endocr Pract*. 2015;21 Suppl 1:1-87.
49. Chattopadhyay S, George A, John J, Sathyapalan T. Two-hour post-challenge glucose is a better predictor of adverse outcome after myocardial infarction than fasting or admission glucose in patients without diabetes. *Acta Diabetol*. 2018;55(5):449-58.
50. Chattopadhyay S, George A, John J, Sathyapalan T. Newly diagnosed abnormal glucose tolerance determines post-MI prognosis in patients with hospital related hyperglycaemia but without known diabetes. *J Diabetes Complications*. 2020;34(4):107518.

**Table 1.** Characteristics of the AMI patients by age groups.

|                       | Age groups     |                | p-value | Total sample<br>(n=5530) |
|-----------------------|----------------|----------------|---------|--------------------------|
|                       | 65-74 (n=3709) | 75-84 (n=1821) |         |                          |
| <b>Female sex</b>     | 1185 (31.9%)   | 831 (45.6%)    | <0.001  | 2016 (36.5%)             |
| <b>Hypertension</b>   | 3060 (82.5%)   | 1602 (88.0%)   | <0.001  | 4662 (84.3%)             |
| <b>Lipid disorder</b> | 2238 (60.3%)   | 906 (49.8%)    | <0.001  | 3144 (56.9%)             |
| <b>Smoking status</b> |                |                |         |                          |
| Smoker                | 674 (18.2%)    | 121 (6.6%)     |         | 795 (14.4%)              |
| Ex-smoker             | 1245 (33.6%)   | 533 (29.3%)    |         | 1778 (32.2%)             |
| Never-smoker          | 1291 (34.8%)   | 792 (43.5%)    |         | 2083 (37.7%)             |
| Missing               | 499 (13.5%)    | 375 (20.6%)    |         | 874 (15.8%)              |

1  
2  
3  
4  
5  
6  
7  
8  
9  
10  
11  
12  
13  
14  
15  
16  
17  
18  
19  
20  
21  
22  
23  
24  
25  
26  
27  
28  
29  
30  
31  
32  
33  
34  
35  
36  
37  
38  
39  
40  
41  
42  
43  
44  
45  
46

|                                                          |              |             |        |              |
|----------------------------------------------------------|--------------|-------------|--------|--------------|
| <b>Glucose level on admission (mg/dl) [Median (IQR)]</b> | 92.0 (71.0)  | 97.0 (71.0) | 0.521  | 94.0 (70.0)  |
| <b>Peak glucose level (mg/dl) [Median (IQR)]</b>         | 98.0 (60.0)  | 95.0 (81)   | <0.001 | 97.0 (87.0)  |
| <b>Cardiac arrest before hospitalization</b>             | 147 (4.0%)   | 41 (2.3%)   |        | 188 (3.4%)   |
| Missing                                                  | 220 (5.9%)   | 159 (8.7%)  |        | 379 (6.9%)   |
| <b>LVEF &lt; 30%</b>                                     | 197 (5.3%)   | 169 (9.3%)  |        | 366 (6.6%)   |
| Missing                                                  | 987 (26.6%)  | 288 (15.8%) |        | 1275 (23.1%) |
| <b>Diabetes</b>                                          | 1376 (37.1%) | 721 (39.6%) | 0.077  | 2097 (37.9%) |
| <b>STEMI</b>                                             |              |             |        |              |
| STEMI                                                    | 1189 (32.1%) | 440 (24.2%) | <0.001 | 1629 (29.5%) |
| NSTEMI                                                   | 1967 (53.0%) | 898 (49.3%) |        | 2865 (51.8%) |

For peer review only



|    |                                                                                                                                                                           |              |              |              |
|----|---------------------------------------------------------------------------------------------------------------------------------------------------------------------------|--------------|--------------|--------------|
| 1  |                                                                                                                                                                           |              |              |              |
| 2  |                                                                                                                                                                           |              |              |              |
| 3  |                                                                                                                                                                           |              |              |              |
| 4  | Bundle branch block                                                                                                                                                       | 316 (8.5%)   | 220 (12.1%)  | 536 (9.7%)   |
| 5  |                                                                                                                                                                           |              |              |              |
| 6  |                                                                                                                                                                           |              |              |              |
| 7  | Not defined                                                                                                                                                               | 237 (6.4%)   | 263 (14.4%)  | 500 (9.0%)   |
| 8  |                                                                                                                                                                           |              |              |              |
| 9  |                                                                                                                                                                           |              |              |              |
| 10 |                                                                                                                                                                           |              |              |              |
| 11 | <b>Typical symptoms</b>                                                                                                                                                   | 2896 (78.1%) | 1218 (66.9%) | 4114 (74.4%) |
| 12 |                                                                                                                                                                           |              |              |              |
| 13 |                                                                                                                                                                           |              |              |              |
| 14 | Missing                                                                                                                                                                   | 54 (1.5%)    | 29 (1.6%)    | 83 (1.5%)    |
| 15 |                                                                                                                                                                           |              |              |              |
| 16 |                                                                                                                                                                           |              |              |              |
| 17 | <hr/>                                                                                                                                                                     |              |              |              |
| 18 |                                                                                                                                                                           |              |              |              |
| 19 | AMI – acute myocardial infarction, IQR – interquartile range, STEMI – ST-segment elevation myocardial infarction, NSTEMI – Non-ST-segment elevation myocardial infarction |              |              |              |
| 20 |                                                                                                                                                                           |              |              |              |
| 21 |                                                                                                                                                                           |              |              |              |
| 22 |                                                                                                                                                                           |              |              |              |
| 23 |                                                                                                                                                                           |              |              |              |
| 24 |                                                                                                                                                                           |              |              |              |
| 25 |                                                                                                                                                                           |              |              |              |
| 26 |                                                                                                                                                                           |              |              |              |
| 27 |                                                                                                                                                                           |              |              |              |
| 28 |                                                                                                                                                                           |              |              |              |
| 29 |                                                                                                                                                                           |              |              |              |
| 30 |                                                                                                                                                                           |              |              |              |
| 31 |                                                                                                                                                                           |              |              |              |
| 32 |                                                                                                                                                                           |              |              |              |
| 33 |                                                                                                                                                                           |              |              |              |
| 34 |                                                                                                                                                                           |              |              |              |
| 35 |                                                                                                                                                                           |              |              |              |
| 36 |                                                                                                                                                                           |              |              |              |
| 37 |                                                                                                                                                                           |              |              |              |
| 38 |                                                                                                                                                                           |              |              |              |
| 39 |                                                                                                                                                                           |              |              |              |
| 40 |                                                                                                                                                                           |              |              |              |
| 41 |                                                                                                                                                                           |              |              |              |
| 42 |                                                                                                                                                                           |              |              |              |
| 43 |                                                                                                                                                                           |              |              |              |
| 44 |                                                                                                                                                                           |              |              |              |
| 45 |                                                                                                                                                                           |              |              |              |
| 46 |                                                                                                                                                                           |              |              |              |

AMI – acute myocardial infarction, IQR – interquartile range, STEMI – ST-segment elevation myocardial infarction, NSTEMI – Non-ST-segment elevation myocardial infarction

**Table 2.** Treatment of AMI patients during hospital stay by age groups

|                                               | Age groups     |                | p-value | Total sample<br>(n=5530) |
|-----------------------------------------------|----------------|----------------|---------|--------------------------|
|                                               | 65-74 (n=3709) | 75-84 (n=1821) |         |                          |
| <b>Drug treatment of AMI patients</b>         |                |                |         |                          |
| Antiplatelets                                 | 3661 (98.7%)   | 1806 (99.1%)   | 0.158   | 5467 (98.8%)             |
| Ca-antagonists                                | 1343 (36.2%)   | 748 (41.1%)    | <0.001  | 2091 (37.8%)             |
| ACE inhibitors                                | 3007 (81.1%)   | 1337 (73.4%)   | <0.001  | 4344 (78.5%)             |
| Beta-blockers                                 | 3492 (94.1%)   | 1683 (92.4%)   | 0.016   | 5175 (93.6%)             |
| Nitrates                                      | 2948 (79.5%)   | 1237 (67.9%)   | <0.001  | 4185 (75.7%)             |
| Angiotensin II antagonists                    | 404 (10.9%)    | 327 (17.9%)    | <0.001  | 731 (13.2%)              |
| Other antihypertensives                       | 635 (17.1%)    | 395 (21.7%)    | <0.001  | 1030 (18.6%)             |
| Statins                                       | 3284 (88.5%)   | 1614 (88.6%)   | 0.956   | 4898 (88.6%)             |
| Insulin                                       | 1250 (33.7%)   | 610 (33.5%)    | 0.904   | 1860 (33.6%)             |
| <b>Recanalization therapy of AMI-patients</b> |                |                |         |                          |
| At least one recanalization therapy           | 2941 (79.3%)   | 1271 (69.8%)   | <0.001  | 4212 (76.2%)             |
| PCI                                           | 2294 (61.8%)   | 1064 (58.4%)   | 0.015   | 3358 (60.7%)             |

|    |                                                                                                                                     |             |             |        |             |
|----|-------------------------------------------------------------------------------------------------------------------------------------|-------------|-------------|--------|-------------|
| 1  |                                                                                                                                     |             |             |        |             |
| 2  |                                                                                                                                     |             |             |        |             |
| 3  |                                                                                                                                     |             |             |        |             |
| 4  | Bypass                                                                                                                              | 672 (18.1%) | 236 (13.0%) | <0.001 | 908 (16.4%) |
| 5  |                                                                                                                                     |             |             |        |             |
| 6  | Thrombolytic therapy                                                                                                                | 160 (4.3%)  | 8 (0.4%)    | <0.001 | 168 (3.0%)  |
| 7  |                                                                                                                                     |             |             |        |             |
| 8  | <hr/>                                                                                                                               |             |             |        |             |
| 9  |                                                                                                                                     |             |             |        |             |
| 10 |                                                                                                                                     |             |             |        |             |
| 11 | AMI – acute myocardial infarction, ACE – Angiotensin-converting enzyme, ASS - PTCA – Percutaneous transluminal coronary angioplasty |             |             |        |             |
| 12 |                                                                                                                                     |             |             |        |             |
| 13 |                                                                                                                                     |             |             |        |             |
| 14 |                                                                                                                                     |             |             |        |             |
| 15 |                                                                                                                                     |             |             |        |             |
| 16 |                                                                                                                                     |             |             |        |             |
| 17 |                                                                                                                                     |             |             |        |             |
| 18 |                                                                                                                                     |             |             |        |             |
| 19 |                                                                                                                                     |             |             |        |             |
| 20 |                                                                                                                                     |             |             |        |             |
| 21 |                                                                                                                                     |             |             |        |             |
| 22 |                                                                                                                                     |             |             |        |             |
| 23 |                                                                                                                                     |             |             |        |             |
| 24 |                                                                                                                                     |             |             |        |             |
| 25 |                                                                                                                                     |             |             |        |             |
| 26 |                                                                                                                                     |             |             |        |             |
| 27 |                                                                                                                                     |             |             |        |             |
| 28 |                                                                                                                                     |             |             |        |             |
| 29 |                                                                                                                                     |             |             |        |             |
| 30 |                                                                                                                                     |             |             |        |             |
| 31 |                                                                                                                                     |             |             |        |             |
| 32 |                                                                                                                                     |             |             |        |             |
| 33 |                                                                                                                                     |             |             |        |             |
| 34 |                                                                                                                                     |             |             |        |             |
| 35 |                                                                                                                                     |             |             |        |             |
| 36 |                                                                                                                                     |             |             |        |             |
| 37 |                                                                                                                                     |             |             |        |             |
| 38 |                                                                                                                                     |             |             |        |             |
| 39 |                                                                                                                                     |             |             |        |             |
| 40 |                                                                                                                                     |             |             |        |             |
| 41 |                                                                                                                                     |             |             |        |             |
| 42 |                                                                                                                                     |             |             |        |             |
| 43 |                                                                                                                                     |             |             |        |             |
| 44 |                                                                                                                                     |             |             |        |             |
| 45 |                                                                                                                                     |             |             |        |             |
| 46 |                                                                                                                                     |             |             |        |             |

AMI – acute myocardial infarction, ACE – Angiotensin-converting enzyme, ASS - PTCA – Percutaneous transluminal coronary angioplasty

For peer review only

**Table 3.** Complications in AMI patients by age groups.

| Major complications        | Age groups     |                | p-value | Total sample<br>(n=5530) |
|----------------------------|----------------|----------------|---------|--------------------------|
|                            | 65-74 (n=3709) | 75-84 (n=1821) |         |                          |
| Cardiac arrest in hospital | 403 (10.9%)    | 256 (14.1%)    | <0.001  | 659 (11.9%)              |
| Cardiogenic shock          | 253 (6.8%)     | 149 (8.2%)     | 0.075   | 402 (7.3%)               |
| Pulmonary edema            | 172 (4.6%)     | 85 (4.7%)      | 1       | 257 (4.6%)               |
| Bradycardia                | 225 (6.1%)     | 99 (5.4%)      | 0.380   | 324 (5.9%)               |
| Ventricular fibrillation   | 121 (3.3%)     | 50 (2.7%)      | 0.336   | 171 (3.1%)               |
| Ventricular tachycardia    | 149 (4.0%)     | 82 (4.5%)      | 0.437   | 231 (4.2%)               |
| Re-infarction              | 92 (2.5%)      | 33 (1.8%)      | 0.140   | 125 (2.3%)               |
| 28-day case fatality       | 292 (7.9%)     | 209 (11.5%)    | <0.001  | 501(9.1%)                |

AMI – acute myocardial infarction

**Table 4.** Association of admission blood glucose levels (per 1 SD increase) with 28-day case fatality and major complications.

|                     | 28-day case fatality |         |                  |         | In-hospital complications |         |                  |         |
|---------------------|----------------------|---------|------------------|---------|---------------------------|---------|------------------|---------|
|                     | OR* (95% CI)         | p-value | OR** (95% CI)    | p-value | OR* (95% CI)              | p-value | OR*** (95%CI)    | p-value |
| <b>Total sample</b> | 1.56 (1.45-1.68)     | <0.0001 | 1.33 (1.19-1.50) | <0.0001 | 1.39 (1.31-1.48)          | <0.0001 | 1.25 (1.17-1.35) | <0.0001 |
| 65-74 years         | 1.63 (1.49-1.79)     | <0.0001 | 1.40 (1.21-1.62) | <0.0001 | 1.36 (1.27-1.46)          | <0.0001 | 1.24 (1.13-1.35) | <0.0001 |
| 75-84 years         | 1.44 (1.26-1.63)     | <0.0001 | 1.21 (0.98-1.50) | 0.0773  | 1.46 (1.31-1.62)          | <0.0001 | 1.29 (1.14-1.47) | <0.0001 |
| <b>Diabetes</b>     |                      |         |                  |         |                           |         |                  |         |
| Total sample        | 1.38 (1.25-1.52)     | <0.0001 | 1.22 (1.06-1.41) | 0.0067  | 1.28 (1.18-1.38)          | <0.0001 | 1.16 (1.07-1.26) | 0.0004  |
| 65-74 years         | 1.40 (1.24-1.57)     | <0.0001 | 1.29 (1.08-1.53) | 0.0045  | 1.22 (1.11-1.34)          | <0.0001 | 1.12 (1.01-1.24) | 0.0251  |
| 75-84 years         | 1.34 (1.12-1.59)     | 0.0011  | 1.10 (0.83-1.46) | 0.5063  | 1.42 (1.23-1.63)          | <0.0001 | 1.25 (1.07-1.45) | 0.0040  |
| <b>No diabetes</b>  |                      |         |                  |         |                           |         |                  |         |
| Total sample        | 2.87 (2.44-3.37)     | <0.0001 | 1.82 (1.45-2.30) | <0.0001 | 2.06 (1.81-2.36)          | <0.0001 | 1.72(1.49-1.99)  | <0.0001 |
| 65-74 years         | 3.18 (2.58-3.91)     | <0.0001 | 1.98 (1.49-2.63) | <0.0001 | 2.12 (1.80-2.49)          | <0.0001 | 1.83 (1.53-2.18) | <0.0001 |
| 75-84 years         | 2.50 (1.91-3.27)     | <0.0001 | 1.55 (1.03-2.32) | 0.0359  | 1.97 (1.56-2.47)          | <0.0001 | 1.52(1.18-1.95)  | 0.0012  |
| <b>STEMI</b>        |                      |         |                  |         |                           |         |                  |         |

|    |               |                   |         |                  |         |                  |         |                  |        |
|----|---------------|-------------------|---------|------------------|---------|------------------|---------|------------------|--------|
| 1  |               |                   |         |                  |         |                  |         |                  |        |
| 2  |               |                   |         |                  |         |                  |         |                  |        |
| 3  |               |                   |         |                  |         |                  |         |                  |        |
| 4  | Total sample  | 1.87 (1.61-2.17)  | <0.0001 | 1.76(1.37-2.26)  | <0.0001 | 1.39 (1.24-1.56) | <0.0001 | 1.26 (1.10-1.45) | 0.0011 |
| 5  |               |                   |         |                  |         |                  |         |                  |        |
| 6  | 65-74 years   | 1.86 (1.56-2.22)  | <0.0001 | 1.86 (1.38-2.51) | <0.0001 | 1.29 (1.13-1.47) | 0.0001  | 1.16 (0.99-1.35) | 0.0625 |
| 7  |               |                   |         |                  |         |                  |         |                  |        |
| 8  | 75-84 years   | 1.88 (1.341-2.51) | <0.0001 | 1.82 (1.08-3.06) | 0.0250  | 1.75 (1.39-2.22) | <0.0001 | 1.68 (1.24-2.27) | 0.0008 |
| 9  |               |                   |         |                  |         |                  |         |                  |        |
| 10 |               |                   |         |                  |         |                  |         |                  |        |
| 11 | <b>NSTEMI</b> |                   |         |                  |         |                  |         |                  |        |
| 12 |               |                   |         |                  |         |                  |         |                  |        |
| 13 | Total sample  | 1.51 (1.36-1.68)  | <0.0001 | 1.17 (0.99-1.38) | 0.0697  | 1.37 (1.26-1.50) | <0.0001 | 1.19 (1.07-1.31) | 0.0009 |
| 14 |               |                   |         |                  |         |                  |         |                  |        |
| 15 | 65-74 years   | 1.58 (1.39-1.81)  | <0.0001 | 1.24 (1.01-1.52) | 0.0446  | 1.34 (1.21-1.49) | <0.0001 | 1.17 (1.04-1.33) | 0.0114 |
| 16 |               |                   |         |                  |         |                  |         |                  |        |
| 17 | 75-84 years   | 1.40 (1.17-1.66)  | <0.0001 | 1.06 (0.77-1.45) | 0.7373  | 1.45 (1.24-1.69) | <0.0001 | 1.20 (1.01-1.43) | 0.0425 |
| 18 |               |                   |         |                  |         |                  |         |                  |        |
| 19 |               |                   |         |                  |         |                  |         |                  |        |

OR\* - adjusted for sex, age

OR\*\* - adjusted for sex, age, diabetes, reperfusion therapy, drug treatment (treatment with angiotensin-converting enzyme (ACE) inhibitor (yes/no), beta-blocker (yes/no), lipid-lowering drug (yes/no), and antiplatelets during hospital stay (yes/no), insulin (yes/no), complications (recurrent infarction, ventricular fibrillation, ventricular tachycardia, bradycardia, pulmonary edema and cardiogenic shock, cardiac arrest during hospital stay).

OR\*\*\* - adjusted for sex, age, diabetes, reperfusion therapy, drug treatment (treatment with angiotensin-converting enzyme (ACE) inhibitor (yes/no), beta-blocker (yes/no), lipid-lowering drug (yes/no), and antiplatelets during hospital stay (yes/no), insulin (yes/no).

1  
2  
3 **Figure 1.** Flow chart diagram of study sample selection  
4  
5  
6

7 Inclusion process for study sample with numbers and reasons for excluding patients from  
8 the original data set.  
9  
10  
11  
12  
13  
14  
15  
16  
17  
18  
19  
20  
21  
22  
23  
24  
25  
26  
27  
28  
29  
30  
31  
32  
33  
34  
35  
36  
37  
38  
39  
40  
41  
42  
43  
44  
45  
46  
47  
48  
49  
50  
51  
52  
53  
54  
55  
56  
57  
58  
59  
60

For peer review only

1  
2  
3  
4  
5  
6  
7  
8  
9  
10  
11  
12  
13  
14  
15  
16  
17  
18  
19  
20  
21  
22  
23  
24  
25  
26  
27  
28  
29  
30  
31  
32  
33  
34  
35  
36  
37  
38  
39  
40  
41  
42  
43  
44  
45  
46  
47  
48  
49  
50  
51  
52  
53  
54  
55  
56  
57  
58  
59  
60

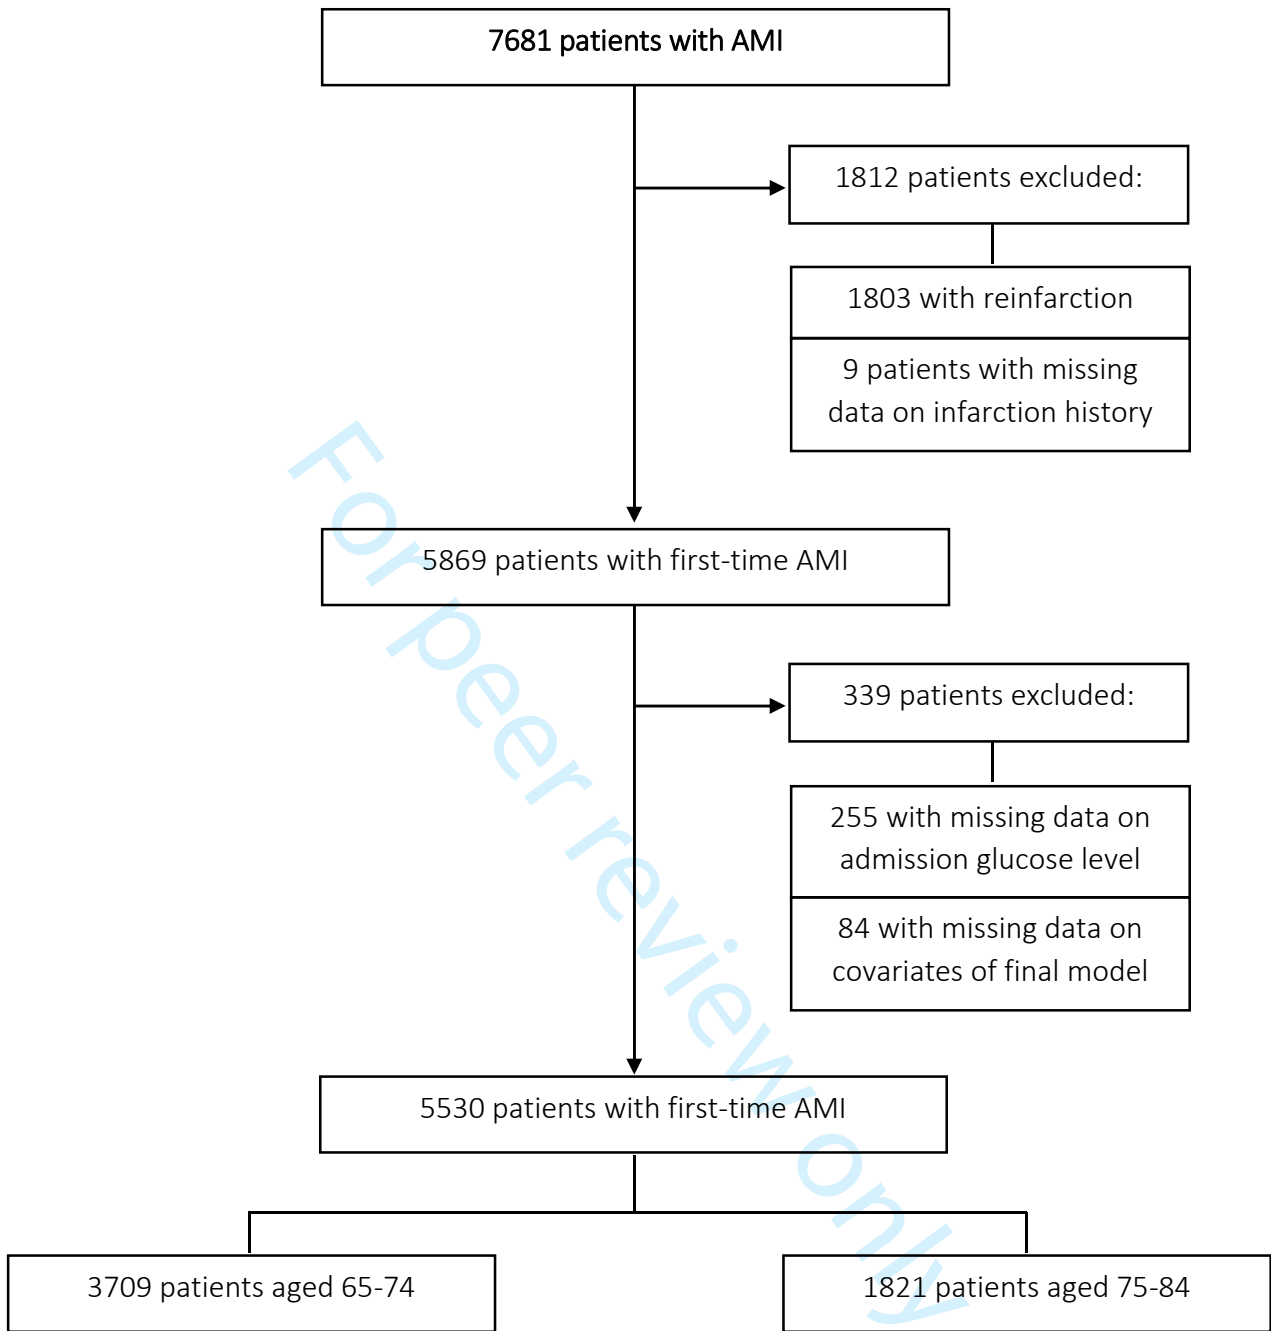



## STROBE Statement—checklist of items that should be included in reports of observational studies

|                              | Item No | Recommendation                                                                                                                                                                                                                                                                                                                                                                                                                                                         | Page No |
|------------------------------|---------|------------------------------------------------------------------------------------------------------------------------------------------------------------------------------------------------------------------------------------------------------------------------------------------------------------------------------------------------------------------------------------------------------------------------------------------------------------------------|---------|
| <b>Title and abstract</b>    | 1       | (a) Indicate the study's design with a commonly used term in the title or the abstract                                                                                                                                                                                                                                                                                                                                                                                 | 1       |
|                              |         | (b) Provide in the abstract an informative and balanced summary of what was done and what was found                                                                                                                                                                                                                                                                                                                                                                    | 2       |
| <b>Introduction</b>          |         |                                                                                                                                                                                                                                                                                                                                                                                                                                                                        |         |
| Background/rationale         | 2       | Explain the scientific background and rationale for the investigation being reported                                                                                                                                                                                                                                                                                                                                                                                   | 4       |
| Objectives                   | 3       | State specific objectives, including any prespecified hypotheses                                                                                                                                                                                                                                                                                                                                                                                                       | 4       |
| <b>Methods</b>               |         |                                                                                                                                                                                                                                                                                                                                                                                                                                                                        |         |
| Study design                 | 4       | Present key elements of study design early in the paper                                                                                                                                                                                                                                                                                                                                                                                                                | 5       |
| Setting                      | 5       | Describe the setting, locations, and relevant dates, including periods of recruitment, exposure, follow-up, and data collection                                                                                                                                                                                                                                                                                                                                        | 5       |
| Participants                 | 6       | (a) <i>Cohort study</i> —Give the eligibility criteria, and the sources and methods of selection of participants. Describe methods of follow-up<br><i>Case-control study</i> —Give the eligibility criteria, and the sources and methods of case ascertainment and control selection. Give the rationale for the choice of cases and controls<br><i>Cross-sectional study</i> —Give the eligibility criteria, and the sources and methods of selection of participants | 5,6     |
|                              |         | (b) <i>Cohort study</i> —For matched studies, give matching criteria and number of exposed and unexposed<br><i>Case-control study</i> —For matched studies, give matching criteria and the number of controls per case                                                                                                                                                                                                                                                 |         |
| Variables                    | 7       | Clearly define all outcomes, exposures, predictors, potential confounders, and effect modifiers. Give diagnostic criteria, if applicable                                                                                                                                                                                                                                                                                                                               | 6       |
| Data sources/<br>measurement | 8*      | For each variable of interest, give sources of data and details of methods of assessment (measurement). Describe comparability of assessment methods if there is more than one group                                                                                                                                                                                                                                                                                   | 5       |
| Bias                         | 9       | Describe any efforts to address potential sources of bias                                                                                                                                                                                                                                                                                                                                                                                                              |         |
| Study size                   | 10      | Explain how the study size was arrived at                                                                                                                                                                                                                                                                                                                                                                                                                              | 6       |
| Quantitative variables       | 11      | Explain how quantitative variables were handled in the analyses. If applicable, describe which groupings were chosen and why                                                                                                                                                                                                                                                                                                                                           |         |
| Statistical methods          | 12      | (a) Describe all statistical methods, including those used to control for confounding                                                                                                                                                                                                                                                                                                                                                                                  | 6,7     |
|                              |         | (b) Describe any methods used to examine subgroups and interactions                                                                                                                                                                                                                                                                                                                                                                                                    |         |
|                              |         | (c) Explain how missing data were addressed                                                                                                                                                                                                                                                                                                                                                                                                                            |         |
|                              |         | (d) <i>Cohort study</i> —If applicable, explain how loss to follow-up was addressed<br><i>Case-control study</i> —If applicable, explain how matching of cases and controls was addressed<br><i>Cross-sectional study</i> —If applicable, describe analytical methods taking account of sampling strategy                                                                                                                                                              |         |
|                              |         | (e) Describe any sensitivity analyses                                                                                                                                                                                                                                                                                                                                                                                                                                  |         |

Continued on next page

1  
2  
3  
4  
5  
6  
7  
8  
9  
10  
11  
12  
13  
14  
15  
16  
17  
18  
19  
20  
21  
22  
23  
24  
25  
26  
27  
28  
29  
30  
31  
32  
33  
34  
35  
36  
37  
38  
39  
40  
41  
42  
43  
44  
45  
46  
47  
48  
49  
50  
51  
52  
53  
54  
55  
56  
57  
58  
59  
60

| <b>Results</b>           |     |                                                                                                                                                                                                              |       |
|--------------------------|-----|--------------------------------------------------------------------------------------------------------------------------------------------------------------------------------------------------------------|-------|
| Participants             | 13* | (a) Report numbers of individuals at each stage of study—eg numbers potentially eligible, examined for eligibility, confirmed eligible, included in the study, completing follow-up, and analysed            | 8     |
|                          |     | (b) Give reasons for non-participation at each stage                                                                                                                                                         |       |
|                          |     | (c) Consider use of a flow diagram                                                                                                                                                                           |       |
| Descriptive data         | 14* | (a) Give characteristics of study participants (eg demographic, clinical, social) and information on exposures and potential confounders                                                                     | 8     |
|                          |     | (b) Indicate number of participants with missing data for each variable of interest                                                                                                                          |       |
|                          |     | (c) <i>Cohort study</i> —Summarise follow-up time (eg, average and total amount)                                                                                                                             |       |
| Outcome data             | 15* | <i>Cohort study</i> —Report numbers of outcome events or summary measures over time                                                                                                                          | 8     |
|                          |     | <i>Case-control study</i> —Report numbers in each exposure category, or summary measures of exposure                                                                                                         |       |
|                          |     | <i>Cross-sectional study</i> —Report numbers of outcome events or summary measures                                                                                                                           |       |
| Main results             | 16  | (a) Give unadjusted estimates and, if applicable, confounder-adjusted estimates and their precision (eg, 95% confidence interval). Make clear which confounders were adjusted for and why they were included | 8,9   |
|                          |     | (b) Report category boundaries when continuous variables were categorized                                                                                                                                    |       |
|                          |     | (c) If relevant, consider translating estimates of relative risk into absolute risk for a meaningful time period                                                                                             |       |
| Other analyses           | 17  | Report other analyses done—eg analyses of subgroups and interactions, and sensitivity analyses                                                                                                               |       |
| <b>Discussion</b>        |     |                                                                                                                                                                                                              |       |
| Key results              | 18  | Summarise key results with reference to study objectives                                                                                                                                                     | 10-14 |
| Limitations              | 19  | Discuss limitations of the study, taking into account sources of potential bias or imprecision. Discuss both direction and magnitude of any potential bias                                                   | 13    |
| Interpretation           | 20  | Give a cautious overall interpretation of results considering objectives, limitations, multiplicity of analyses, results from similar studies, and other relevant evidence                                   | 10-13 |
| Generalisability         | 21  | Discuss the generalisability (external validity) of the study results                                                                                                                                        | 13    |
| <b>Other information</b> |     |                                                                                                                                                                                                              |       |
| Funding                  | 22  | Give the source of funding and the role of the funders for the present study and, if applicable, for the original study on which the present article is based                                                | 15    |

\*Give information separately for cases and controls in case-control studies and, if applicable, for exposed and unexposed groups in cohort and cross-sectional studies.

**Note:** An Explanation and Elaboration article discusses each checklist item and gives methodological background and published examples of transparent reporting. The STROBE checklist is best used in conjunction with this article (freely available on the Web sites of PLoS Medicine at <http://www.plosmedicine.org/>, Annals of Internal Medicine at <http://www.annals.org/>, and Epidemiology at <http://www.epidem.com/>). Information on the STROBE Initiative is available at [www.strobe-statement.org](http://www.strobe-statement.org).
